# Supplementary material for: Long non-coding RNA, HOTAIRM1, promotes glioma malignancy by forming a ceRNA network
Source: Aging (Albany NY). 2019 Sep 2;11(17):6805–38. doi: 10.18632/aging.102205 (PMC6756894; doi:10.18632/aging.102205)
Supplement: Supplementary Dataset 1 [file aging-11-102205-s003.xlsx]

## Sheet: up-DEGs (754) in TCGA
Dataset S1
Differentially upregulated genes in high-exp group compared with low-exp group.
GeneID	logFC	AveExpr	t	P.Value	adj.P.Val	B
PDPN	3.33173	3.14568	23.4036	5.14e-89	5.08e-85	192.216
CD58	2.09058	2.08662	23.3059	1.81e-88	1.19e-84	190.961
STEAP3	2.77337	2.39947	22.9973	9.7e-87	4.79e-83	187.003
S100A11	2.20111	5.78948	22.5722	2.3e-84	9.1e-81	181.562
EMP3	3.42836	3.13327	22.5006	5.78e-84	1.9e-80	180.647
CLIC1	2.22977	4.87088	22.4817	7.37e-84	2.08e-80	180.405
CCDC109B	2.63497	1.87576	22.4229	1.57e-83	3.44e-80	179.654
FSTL1	2.03498	3.49472	21.5554	1.05e-78	1.38e-75	168.604
ANXA1	3.03423	3.65946	21.4767	2.85e-78	3.41e-75	167.606
TNFRSF12A	2.69731	3.01698	21.3403	1.62e-77	1.78e-74	165.876
PLP2	2.50654	3.73979	21.2819	3.42e-77	3.07e-74	165.136
ANXA2	2.66592	3.28146	21.2659	4.19e-77	3.6e-74	164.934
CASP4	2.06059	1.17311	21.1779	1.28e-76	1.06e-73	163.819
CARD16	2.488	1.27991	21.022	9.3e-76	6.12e-73	161.849
RAB42	2.40168	1.09809	20.7209	4.24e-74	1.99e-71	158.049
SERPINH1	2.16627	3.31237	20.7096	4.89e-74	2.2e-71	157.907
PTPN7	2.09192	0.603416	20.7113	4.78e-74	2.2e-71	157.929
C1RL	2.07154	1.90994	20.5423	4.06e-73	1.6e-70	155.802
TAGLN2	2.36611	5.34597	20.5185	5.48e-73	2.01e-70	155.503
S100A4	2.82474	2.65698	20.3259	6.24e-72	1.96e-69	153.084
TIMP1	3.4365	4.61187	20.2226	2.29e-71	6.56e-69	151.789
RAB34	2.38683	2.61242	20.0602	1.77e-70	4.48e-68	149.757
TUBA1C	2.45466	2.49089	20.0368	2.37e-70	5.72e-68	149.464
IGFBP2	3.69069	3.36766	20.0187	2.98e-70	7.1e-68	149.238
MSR1	2.34629	1.83964	19.984	4.61e-70	1.05e-67	148.805
CHI3L1	4.41899	4.62677	19.9572	6.45e-70	1.43e-67	148.47
LSP1	2.29829	1.54685	19.9262	9.52e-70	2.02e-67	148.083
TYMP	2.13007	2.24326	19.9135	1.12e-69	2.34e-67	147.925
MMP14	2.03022	4.02096	19.8967	1.38e-69	2.84e-67	147.715
C1R	2.29577	3.83281	19.7371	1.02e-68	1.92e-66	145.726
HOXA1	4.38777	0.313481	19.6993	1.63e-68	2.99e-66	145.255
SERPINA1	2.25933	2.3619	19.593	6.17e-68	1.07e-65	143.934
HLA-DRA	2.12705	7.4014	19.5617	9.13e-68	1.54e-65	143.544
HOXA5	5.31787	0.862288	19.4942	2.12e-67	3.35e-65	142.706
SH2D4A	2.78838	0.682795	19.4202	5.33e-67	7.86e-65	141.789
DPYD	2.25598	1.70471	19.4092	6.12e-67	8.82e-65	141.652
SERPING1	2.26559	4.1659	19.3546	1.21e-66	1.67e-64	140.976
SHOX2	4.49005	0.717209	19.2623	3.81e-66	4.95e-64	139.833
KIAA0040	2.12117	2.07238	19.1387	1.77e-65	2.21e-63	138.305
PLAU	2.72826	2.06151	18.9759	1.33e-64	1.57e-62	136.298
GPX8	3.25265	0.980908	18.9028	3.29e-64	3.73e-62	135.398
METTL7B	3.11223	3.37453	18.8144	9.81e-64	1.03e-61	134.312
EFEMP2	2.03171	2.76138	18.8101	1.03e-63	1.08e-61	134.259
FCGBP	2.43222	2.88845	18.759	1.94e-63	1.98e-61	133.631
GPR65	2.11963	0.94016	18.7335	2.66e-63	2.67e-61	133.319
GBP1	2.3334	2.65536	18.6415	8.27e-63	7.85e-61	132.192
SOCS1	2.29472	1.10737	18.6081	1.25e-62	1.17e-60	131.782
ABCC3	4.13041	1.07188	18.5986	1.4e-62	1.29e-60	131.666
PINLYP	2.33935	1.0739	18.5294	3.28e-62	2.87e-60	130.82
RDH10	2.12918	2.30882	18.4999	4.72e-62	4.07e-60	130.459
CLEC18B	2.46617	0.81632	18.4041	1.53e-61	1.23e-59	129.29
HLA-DQA1	2.34232	2.07999	18.4017	1.58e-61	1.25e-59	129.261
PLAUR	2.26897	1.54081	18.3047	5.17e-61	3.9e-59	128.078
TNFAIP6	3.21839	1.44945	18.3033	5.26e-61	3.95e-59	128.061
CHI3L2	3.00132	3.26314	18.1424	3.76e-60	2.61e-58	126.106
PDCD1LG2	2.05875	0.992204	18.1122	5.44e-60	3.69e-58	125.738
CISH	2.2043	0.621109	18.1028	6.1e-60	4.09e-58	125.624
CLEC5A	3.26224	0.840088	18.073	8.77e-60	5.72e-58	125.263
MEOX2	4.69373	1.24058	18.0381	1.34e-59	8.5e-58	124.84
CXCL10	3.99643	1.63103	17.9877	2.48e-59	1.52e-57	124.23
NNMT	4.00825	1.89706	17.9452	4.16e-59	2.49e-57	123.715
APOL4	2.57027	1.71421	17.8513	1.3e-58	7.48e-57	122.581
ADAM12	3.11734	0.846515	17.811	2.12e-58	1.2e-56	122.095
CSTA	2.48747	0.845749	17.7609	3.9e-58	2.16e-56	121.491
TMEM71	2.54751	0.676681	17.7501	4.44e-58	2.44e-56	121.36
CLCF1	2.65042	1.11436	17.7113	7.11e-58	3.85e-56	120.893
COL5A2	2.56938	2.28708	17.6996	8.19e-58	4.42e-56	120.752
EN1	3.64932	0.721348	17.6898	9.21e-58	4.95e-56	120.635
FABP5	3.24336	2.33978	17.6821	1.01e-57	5.42e-56	120.542
IL4I1	2.22291	0.855287	17.6716	1.15e-57	6.1e-56	120.416
NSUN7	2.56768	0.450054	17.5514	4.91e-57	2.47e-55	118.972
PTX3	3.23097	1.68018	17.5074	8.35e-57	4.1e-55	118.444
TNFRSF11B	2.79821	0.939046	17.5015	8.95e-57	4.38e-55	118.374
PLEK2	2.66783	0.607963	17.4514	1.64e-56	7.8e-55	117.773
SRPX2	2.85821	1.73902	17.3944	3.25e-56	1.51e-54	117.091
SFRP4	2.36597	2.06731	17.3855	3.62e-56	1.67e-54	116.985
FBXO17	2.20753	1.39455	17.3708	4.32e-56	1.98e-54	116.808
COL6A2	3.53483	2.88464	17.2898	1.14e-55	5.04e-54	115.841
DIRAS3	2.24029	2.23497	17.2513	1.81e-55	7.81e-54	115.382
HOXB7	3.6365	0.863371	17.2267	2.44e-55	1.03e-53	115.089
C1S	2.01679	3.44312	17.1994	3.38e-55	1.42e-53	114.764
GDF15	3.56547	1.13624	17.1399	6.88e-55	2.8e-53	114.057
CA3	4.88077	1.34657	17.1318	7.59e-55	3.07e-53	113.959
EVC2	2.48532	0.430147	17.0567	1.86e-54	7.25e-53	113.068
HOXA3	6.48748	0.419899	17.0128	3.14e-54	1.2e-52	112.547
FMOD	3.99343	1.98967	17.0023	3.56e-54	1.36e-52	112.422
MAP1LC3C	3.87523	0.693455	16.995	3.88e-54	1.46e-52	112.336
NAMPT	2.23285	3.44244	16.9615	5.79e-54	2.14e-52	111.939
COL4A1	2.39242	3.37246	16.9285	8.58e-54	3.12e-52	111.548
COL4A2	2.18851	3.58505	16.9182	9.7e-54	3.5e-52	111.426
RBP1	2.55997	2.66998	16.8436	2.35e-53	8.18e-52	110.545
PCOLCE	2.8528	2.19129	16.8432	2.37e-53	8.21e-52	110.54
PDLIM1	2.08887	2.24151	16.808	3.59e-53	1.21e-51	110.124
VASN	2.15124	1.8017	16.7882	4.54e-53	1.52e-51	109.891
RNASE2	2.16943	1.8987	16.7203	1.02e-52	3.27e-51	109.091
SOD2	2.04885	4.28492	16.6917	1.43e-52	4.55e-51	108.754
VAV3	2.5826	0.855139	16.5296	9.67e-52	2.9e-50	106.851
MAP3K7CL	2.28403	1.06575	16.5212	1.07e-51	3.19e-50	106.752
PTPN22	2.50479	0.244798	16.469	1.97e-51	5.74e-50	106.142
FAM26F	2.04379	1.53476	16.2242	3.49e-50	9.27e-49	103.286
OCIAD2	2.53097	2.28281	16.1988	4.7e-50	1.24e-48	102.991
SPP1	2.30061	7.92461	16.1855	5.49e-50	1.43e-48	102.837
AEBP1	2.21265	4.52252	16.1773	6.04e-50	1.57e-48	102.742
LOXL1	2.7857	1.04879	16.1573	7.63e-50	1.97e-48	102.509
HOXA4	6.3263	0.521908	16.1077	1.36e-49	3.46e-48	101.934
SOCS2	2.44812	1.68585	16.1016	1.46e-49	3.71e-48	101.863
CD248	2.3111	2.09173	16.0406	2.97e-49	7.41e-48	101.157
RARRES2	3.08753	2.26179	16.0207	3.75e-49	9.26e-48	100.927
G0S2	2.87373	1.49049	15.9856	5.63e-49	1.37e-47	100.522
HOXC10	5.91888	0.68504	15.9807	5.97e-49	1.45e-47	100.465
HOXB3	5.53127	0.52669	15.9577	7.8e-49	1.87e-47	100.199
DMRTA2	3.67046	0.88207	15.946	8.93e-49	2.13e-47	100.064
LGALS3	2.35141	3.9494	15.9184	1.23e-48	2.9e-47	99.7464
LOX	3.1967	1.23977	15.8848	1.82e-48	4.22e-47	99.3584
KDELR3	2.72831	1.09558	15.8741	2.06e-48	4.77e-47	99.235
SECTM1	2.09216	1.25796	15.815	4.07e-48	9.3e-47	98.5552
SEC61G	3.57584	4.83271	15.7129	1.33e-47	2.91e-46	97.3833
FLNC	2.29628	2.53969	15.7092	1.38e-47	3.03e-46	97.3414
SPOCD1	2.76395	1.64458	15.6604	2.42e-47	5.19e-46	96.7831
PDLIM4	2.59711	1.91016	15.6232	3.72e-47	7.83e-46	96.3571
IL13RA2	2.9836	1.6004	15.622	3.77e-47	7.92e-46	96.3433
CD48	2.24087	0.779805	15.6119	4.24e-47	8.83e-46	96.2285
HOXD10	4.46752	0.605495	15.5639	7.35e-47	1.51e-45	95.6804
HOXD11	5.27698	0.417568	15.5537	8.27e-47	1.69e-45	95.5636
COL1A2	3.36838	2.73385	15.5171	1.26e-46	2.52e-45	95.1462
HAMP	2.13415	1.33802	15.4162	3.99e-46	7.76e-45	93.9991
MYO1G	2.15404	0.450441	15.3883	5.49e-46	1.06e-44	93.6824
IGF2BP3	3.24369	0.452739	15.3818	5.92e-46	1.14e-44	93.6083
HOXB2	4.18886	0.750399	15.3223	1.17e-45	2.19e-44	92.934
DDIT4L	3.01167	1.19438	15.3174	1.23e-45	2.31e-44	92.878
GPR82	2.16467	0.522768	15.2259	3.49e-45	6.35e-44	91.844
COL1A1	3.6816	2.27038	15.1834	5.66e-45	1.01e-43	91.3636
TXLNB	2.04879	0.789887	15.172	6.45e-45	1.14e-43	91.2349
HOXA6	4.72193	0.342154	15.1611	7.29e-45	1.29e-43	91.1129
SERPINE1	2.81869	3.09515	15.1574	7.61e-45	1.34e-43	91.0707
TGFBI	2.25626	2.69191	15.1191	1.17e-44	2.04e-43	90.6394
NOX4	2.21091	0.470969	15.1116	1.28e-44	2.21e-43	90.5548
IFI30	2.09394	0.331427	15.1016	1.43e-44	2.46e-43	90.4425
AQP5	3.12297	0.764271	15.0973	1.5e-44	2.57e-43	90.3947
PKIB	2.31489	1.38782	15.0926	1.58e-44	2.71e-43	90.3414
NKX2-5	4.09666	0.583192	15.0833	1.76e-44	3e-43	90.2373
HS3ST3B1	2.82148	0.692195	15.0806	1.82e-44	3.08e-43	90.2062
SERPINA3	2.05281	0.777071	15.0645	2.18e-44	3.66e-43	90.0263
HOXA7	4.03	0.448379	15.0514	2.53e-44	4.23e-43	89.8784
MOXD1	2.94768	1.61086	14.9626	6.87e-44	1.1e-42	88.8837
COL3A1	3.7508	2.5356	14.9306	9.86e-44	1.57e-42	88.5251
COL5A1	3.25885	1.17376	14.9204	1.11e-43	1.76e-42	88.4114
LTF	3.8339	1.93995	14.8765	1.81e-43	2.83e-42	87.9205
SERPINA5	3.07894	0.735616	14.8302	3.05e-43	4.69e-42	87.4042
GZMA	2.34747	0.736414	14.8228	3.31e-43	5.08e-42	87.3213
AC113404.1	2.01132	0.7498	14.8072	3.94e-43	6.02e-42	87.1477
HTRA3	2.2419	0.84604	14.7902	4.77e-43	7.2e-42	86.9586
ARSJ	2.20568	0.980839	14.7795	5.38e-43	8.09e-42	86.8393
CD2	2.44207	0.616662	14.7697	6e-43	9e-42	86.7305
HOXC9	5.1895	0.373596	14.7479	7.66e-43	1.14e-41	86.4881
SOCS3	2.11325	2.83307	14.7297	9.39e-43	1.39e-41	86.2862
POSTN	5.3687	1.34372	14.7203	1.04e-42	1.54e-41	86.1821
E2F7	2.12199	0.589173	14.7142	1.12e-42	1.64e-41	86.1135
PLA2G5	2.4037	1.70249	14.7093	1.18e-42	1.73e-41	86.0592
HIST1H2BH	3.58072	0.458939	14.6985	1.33e-42	1.94e-41	85.9395
MACC1	2.4238	0.0860548	14.6711	1.81e-42	2.61e-41	85.6359
HOXA10	3.55936	0.6173	14.6514	2.25e-42	3.23e-41	85.4175
LIF	3.03101	0.959668	14.6053	3.76e-42	5.31e-41	84.9069
TWIST1	2.22267	1.04843	14.5825	4.85e-42	6.78e-41	84.6555
VEGFA	2.47121	2.5015	14.5771	5.15e-42	7.19e-41	84.5962
IGF2BP2	2.88013	0.834496	14.5678	5.71e-42	7.95e-41	84.4929
CD3D	2.41822	0.529311	14.5523	6.78e-42	9.35e-41	84.3224
HOXA2	7.09317	0.411001	14.5333	8.38e-42	1.15e-40	84.1117
SPAG4	2.19635	0.761269	14.5013	1.2e-41	1.62e-40	83.759
TSTD1	2.1865	1.87357	14.4753	1.59e-41	2.14e-40	83.4729
FAM20A	2.34554	0.775307	14.4672	1.74e-41	2.34e-40	83.3838
SDC1	2.26281	1.49575	14.4635	1.82e-41	2.43e-40	83.3431
FOXJ1	2.40634	2.40655	14.3342	7.58e-41	9.81e-40	81.9244
TEX26	2.20381	0.897404	14.3147	9.4e-41	1.2e-39	81.7106
MYBPH	3.7758	0.693727	14.2942	1.18e-40	1.5e-39	81.4867
WISP1	3.68049	0.722618	14.2323	2.33e-40	2.89e-39	80.8101
CCDC8	2.17448	1.21586	14.2068	3.08e-40	3.78e-39	80.5319
SIT1	2.39093	0.260138	14.1917	3.63e-40	4.43e-39	80.3678
EN2	2.18931	0.734568	14.1379	6.56e-40	7.85e-39	79.782
CD163	2.40207	2.55651	14.1175	8.19e-40	9.74e-39	79.5607
ETV7	2.0726	0.578974	14.1138	8.54e-40	1.01e-38	79.52
MMP9	3.66628	1.28769	14.0805	1.23e-39	1.44e-38	79.1594
SH2D2A	2.13371	0.307042	14.0683	1.4e-39	1.64e-38	79.0264
FCGR2B	3.27348	0.469944	14.0524	1.67e-39	1.94e-38	78.8549
GBP5	2.73837	0.407315	13.9933	3.18e-39	3.65e-38	78.2151
EXOC3L2	2.31125	0.519143	13.9929	3.19e-39	3.66e-38	78.2104
HOXC6	4.1808	0.286376	13.9843	3.51e-39	4.01e-38	78.1173
DEPDC1	2.01779	0.582709	13.9657	4.29e-39	4.89e-38	77.9162
CTD-2192J16.22	2.36541	0.886888	13.94	5.67e-39	6.41e-38	77.6391
LYZ	2.2129	2.39706	13.9374	5.84e-39	6.58e-38	77.6111
TREM1	3.45245	0.651444	13.9127	7.63e-39	8.52e-38	77.3453
SLC47A2	2.35852	0.831162	13.8664	1.26e-38	1.39e-37	76.8466
FBXO39	2.97961	0.195898	13.866	1.27e-38	1.4e-37	76.8419
SPON2	2.34214	0.882943	13.8537	1.45e-38	1.59e-37	76.7102
STAC	3.17171	0.643743	13.8421	1.64e-38	1.8e-37	76.5853
POTEF	2.74765	0.066718	13.84	1.68e-38	1.84e-37	76.5625
IL2RB	2.04443	0.367381	13.7664	3.72e-38	3.97e-37	75.7732
IBSP	3.84071	0.918622	13.6959	7.94e-38	8.34e-37	75.0188
ISL2	2.61038	0.343693	13.6747	9.97e-38	1.04e-36	74.7928
CNGA3	2.00665	1.79725	13.6631	1.13e-37	1.17e-36	74.6691
ADAM33	2.42431	0.933876	13.6523	1.27e-37	1.31e-36	74.5532
CD3E	2.02937	0.510388	13.6415	1.43e-37	1.47e-36	74.4385
SAA1	5.7637	1.10398	13.6361	1.51e-37	1.55e-36	74.3808
VNN2	2.05978	0.602226	13.6285	1.64e-37	1.67e-36	74.3003
COL8A1	3.04345	0.806878	13.6111	1.97e-37	2.01e-36	74.1151
ULBP3	2.02188	0.39557	13.6099	2e-37	2.03e-36	74.1022
OTP	4.13892	0.339234	13.5797	2.77e-37	2.79e-36	73.7802
HOXD13	4.83559	0.525256	13.5455	3.99e-37	3.98e-36	73.4177
POTEE	3.36993	0.0779846	13.5393	4.26e-37	4.24e-36	73.351
ADM	2.39672	2.03058	13.5193	5.27e-37	5.21e-36	73.1399
GALNT3	2.14286	0.459258	13.5172	5.4e-37	5.33e-36	73.1169
PLA2G2A	4.31216	1.00297	13.4507	1.1e-36	1.06e-35	72.4127
POTEI	3.03844	0.0263108	13.4328	1.33e-36	1.28e-35	72.2243
CELSR1	2.12784	0.551307	13.3985	1.91e-36	1.83e-35	71.8614
CTHRC1	2.77178	1.3378	13.3478	3.27e-36	3.09e-35	71.3277
C10orf55	2.08352	0.188066	13.3355	3.73e-36	3.51e-35	71.1979
MMP11	2.4376	0.467156	13.3274	4.06e-36	3.82e-35	71.1133
ARL9	2.07455	0.670705	13.3233	4.25e-36	3.98e-35	71.0692
PRF1	2.00222	0.771411	13.2932	5.84e-36	5.42e-35	70.7532
C11orf63	2.09605	0.517159	13.2868	6.25e-36	5.79e-35	70.6859
CLEC12A	2.63926	0.260157	13.1302	3.25e-35	2.88e-34	69.0481
AOX1	2.32161	0.411031	13.1092	4.06e-35	3.57e-34	68.8287
EIF3CL	2.24055	0.277867	13.0891	5.01e-35	4.39e-34	68.62
DPEP1	2.49286	0.812554	13.0727	5.95e-35	5.2e-34	68.4495
ITGB3	2.00927	0.386384	13.038	8.56e-35	7.41e-34	68.0884
LUM	3.29209	1.4738	13.0271	9.59e-35	8.27e-34	67.9759
NPNT	2.08864	1.77303	12.9747	1.66e-34	1.42e-33	67.4326
CHRNA9	3.34567	0.582771	12.9425	2.32e-34	1.97e-33	67.0994
C15orf48	2.81937	0.476336	12.9089	3.29e-34	2.77e-33	66.7522
POTEJ	2.76813	0.0608299	12.8778	4.54e-34	3.8e-33	66.4317
S100A9	2.28611	3.47247	12.8638	5.26e-34	4.37e-33	66.2871
HOXD9	2.34778	0.824054	12.8141	8.8e-34	7.23e-33	65.7759
OASL	2.11588	0.883302	12.8132	8.88e-34	7.29e-33	65.7665
HOXB4	5.16999	0.363956	12.8059	9.58e-34	7.85e-33	65.692
ERP27	2.06019	0.376426	12.7725	1.35e-33	1.1e-32	65.3491
CXCL11	3.14173	0.664252	12.7161	2.42e-33	1.94e-32	64.771
PITX1	2.88736	0.517773	12.6797	3.53e-33	2.8e-32	64.399
GPRC5A	2.40786	0.459452	12.6696	3.91e-33	3.1e-32	64.2961
AC005480.1	2.42254	0.324829	12.6507	4.75e-33	3.75e-32	64.1033
HOXC8	4.93548	0.267002	12.6294	5.91e-33	4.63e-32	63.8864
EYA4	2.9686	0.499376	12.5656	1.14e-32	8.74e-32	63.238
GPR141	2.44948	0.171245	12.5506	1.33e-32	1.02e-31	63.0856
IGFBP3	2.25799	3.70759	12.515	1.91e-32	1.45e-31	62.7246
MMP19	2.70585	0.695389	12.5123	1.96e-32	1.49e-31	62.6973
CXCL9	2.77195	0.670463	12.4979	2.27e-32	1.71e-31	62.5516
DPP4	2.85788	0.549277	12.4778	2.79e-32	2.1e-31	62.3487
HNRNPCL1	2.26433	0.0879436	12.4747	2.87e-32	2.16e-31	62.3173
STC1	2.58299	0.769138	12.4617	3.28e-32	2.46e-31	62.1854
METTL21B	2.28558	1.98751	12.4539	3.55e-32	2.65e-31	62.1072
ESM1	2.58137	0.829486	12.3615	9.08e-32	6.61e-31	61.1765
DES	2.19344	0.920093	12.3551	9.69e-32	7.04e-31	61.1117
TCTEX1D1	3.37135	0.81582	12.3109	1.52e-31	1.09e-30	60.6682
HOXC11	6.51107	0.24613	12.3061	1.59e-31	1.14e-30	60.6204
PHLDA2	2.36005	0.756908	12.2946	1.79e-31	1.28e-30	60.5046
C6orf141	2.94116	0.542447	12.2593	2.55e-31	1.8e-30	60.1517
POTEG	2.64005	0.0347639	12.2304	3.41e-31	2.4e-30	59.8633
GZMK	2.38431	0.289018	12.2112	4.14e-31	2.9e-30	59.6715
PLAC8	2.12356	0.495736	12.1982	4.72e-31	3.29e-30	59.5418
PRR33	2.30474	0.102773	12.1618	6.8e-31	4.69e-30	59.18
CA9	2.92958	1.04117	12.0677	1.74e-30	1.18e-29	58.2458
F2RL2	2.84341	0.498495	11.9984	3.48e-30	2.31e-29	57.5615
CPA4	2.68787	0.247806	11.9786	4.24e-30	2.8e-29	57.366
STEAP1	2.07563	0.960038	11.9658	4.81e-30	3.17e-29	57.2405
GSX2	3.33647	0.541087	11.9271	7.06e-30	4.61e-29	56.8596
S100A8	2.19299	2.05912	11.9173	7.78e-30	5.07e-29	56.7634
RP11-544M22.13	2.4869	0.0806036	11.9126	8.15e-30	5.31e-29	56.7174
MFAP2	2.70591	0.774167	11.8837	1.08e-29	6.99e-29	56.434
MAGED4B	2.39278	0.159317	11.8819	1.1e-29	7.11e-29	56.4162
ATP5L2	2.02401	0.111165	11.8788	1.14e-29	7.32e-29	56.3859
SIRPG	2.18659	0.113539	11.8382	1.7e-29	1.08e-28	55.9887
CLEC18C	2.37426	0.067196	11.8196	2.04e-29	1.29e-28	55.8064
METTL1	2.16547	2.60637	11.8073	2.31e-29	1.46e-28	55.6864
GPR1	4.31067	0.250239	11.7653	3.48e-29	2.17e-28	55.2774
VDR	2.47446	0.259716	11.7537	3.9e-29	2.43e-28	55.1648
CNPY1	2.66111	0.546068	11.7279	5.03e-29	3.11e-28	54.9133
OSR2	2.43437	0.333376	11.7245	5.2e-29	3.21e-28	54.8809
OR51E1	3.15819	0.19602	11.7094	6.03e-29	3.72e-28	54.7335
TNFSF14	2.99529	0.229797	11.6945	6.98e-29	4.27e-28	54.5893
MAGED4	2.59377	0.151994	11.6855	7.62e-29	4.66e-28	54.5019
MXRA5	2.13546	0.98124	11.6661	9.21e-29	5.61e-28	54.314
C20orf195	2.18836	0.127363	11.6327	1.28e-28	7.74e-28	53.9912
CXCR3	2.41665	0.180594	11.6282	1.33e-28	8.08e-28	53.9478
CD8B	2.19441	0.217093	11.5966	1.81e-28	1.09e-27	53.6429
CXCR6	2.0898	0.169417	11.5869	1.99e-28	1.2e-27	53.5488
XCL2	2.27909	0.1493	11.5728	2.29e-28	1.37e-27	53.413
F8A3	2.57546	0.0586065	11.5632	2.51e-28	1.5e-27	53.3209
CD3G	2.03372	0.116962	11.547	2.94e-28	1.74e-27	53.1653
FAM183A	4.66622	0.605121	11.5402	3.14e-28	1.86e-27	53.0996
HP	4.1497	0.479328	11.5255	3.62e-28	2.14e-27	52.958
LOXL4	2.15544	0.455351	11.4948	4.87e-28	2.86e-27	52.6637
RARRES1	3.1276	0.832655	11.4683	6.29e-28	3.67e-27	52.4103
SLAMF1	2.29537	0.0795091	11.4565	7.05e-28	4.1e-27	52.2976
BDKRB2	2.26938	0.421548	11.4278	9.3e-28	5.38e-27	52.0226
FAM156B	2.33674	0.0362387	11.3816	1.45e-27	8.31e-27	51.582
HOXC13	6.27837	0.282101	11.3342	2.29e-27	1.3e-26	51.1313
C7orf57	3.62552	0.623807	11.3261	2.47e-27	1.4e-26	51.0548
GJB2	2.64336	1.07371	11.3049	3.03e-27	1.71e-26	50.8536
ASPN	2.306	0.690819	11.3033	3.07e-27	1.73e-26	50.8385
RASEF	2.78098	0.295766	11.2946	3.34e-27	1.88e-26	50.756
VSTM1	2.93635	0.258384	11.2355	5.87e-27	3.26e-26	50.1968
ADAMTS3	2.16968	0.531114	11.1973	8.45e-27	4.66e-26	49.8366
RGS22	2.33632	0.356504	11.1791	1e-26	5.52e-26	49.6654
NKX3-2	2.34589	0.278954	10.994	5.77e-26	3.06e-25	47.9345
ACOT12	2.70375	0.0889972	10.9816	6.48e-26	3.43e-25	47.8191
RSPH4A	2.0393	0.812556	10.98	6.58e-26	3.48e-25	47.8043
LDLRAD2	2.47448	0.166498	10.9373	9.82e-26	5.13e-25	47.4077
CHRNA1	3.65665	0.700149	10.9171	1.19e-25	6.17e-25	47.2212
CHODL	2.99245	0.740369	10.8967	1.43e-25	7.42e-25	47.0326
GALNT5	3.45162	0.222623	10.8756	1.75e-25	8.98e-25	46.8371
TMEM61	2.00159	0.198478	10.8748	1.76e-25	9.04e-25	46.8297
TCTEX1D4	2.53716	0.155055	10.8664	1.9e-25	9.75e-25	46.7525
C2orf70	2.424	0.233217	10.8652	1.92e-25	9.86e-25	46.7418
CCDC182	2.06103	0.119255	10.8538	2.14e-25	1.09e-24	46.6361
HIST2H2AA4	3.84568	0.0982509	10.8095	3.23e-25	1.63e-24	46.2288
OTOS	2.89223	1.00884	10.7979	3.6e-25	1.82e-24	46.1224
GATA3	2.36758	0.216842	10.7607	5.08e-25	2.54e-24	45.7804
HLA-DQA2	2.0198	1.7517	10.7371	6.31e-25	3.14e-24	45.565
AC012005.3	3.8794	0.12327	10.7367	6.34e-25	3.16e-24	45.5615
TGM5	2.5109	0.328397	10.7309	6.69e-25	3.33e-24	45.5083
CCR2	2.28114	0.230052	10.6804	1.07e-24	5.25e-24	45.0466
PODNL1	2.1049	0.559326	10.6787	1.08e-24	5.33e-24	45.0317
FAM19A3	2.1223	0.43696	10.56	3.21e-24	1.54e-23	43.9544
ITGBL1	2.26131	0.249546	10.5378	3.94e-24	1.88e-23	43.7535
F13A1	2.76903	1.8252	10.521	4.59e-24	2.18e-23	43.6023
DNAH11	2.78265	0.144583	10.4833	6.47e-24	3.05e-23	43.2624
CFAP77	2.07679	0.736636	10.4782	6.77e-24	3.19e-23	43.2165
OTX1	2.05962	0.703063	10.4617	7.87e-24	3.69e-23	43.0686
HOXD12	3.2636	0.0991722	10.4501	8.74e-24	4.09e-23	42.9647
PI3	4.30282	0.965884	10.4285	1.06e-23	4.95e-23	42.7711
LILRA5	2.39139	0.332597	10.3316	2.55e-23	1.17e-22	41.9057
ZNF474	2.20981	0.335893	10.2424	5.67e-23	2.55e-22	41.1146
TRAT1	2.23987	0.0566728	10.2239	6.69e-23	3e-22	40.9508
RHOD	2.02159	0.732603	10.2217	6.82e-23	3.06e-22	40.9311
WDR38	3.04381	0.675768	10.1972	8.49e-23	3.79e-22	40.7157
ULBP1	2.01807	0.263155	10.1714	1.07e-22	4.74e-22	40.4881
TRPM8	2.54013	0.324903	10.1573	1.21e-22	5.36e-22	40.364
PAX3	3.79109	0.231602	10.1229	1.64e-22	7.21e-22	40.0619
TDO2	2.31646	0.337911	10.0945	2.11e-22	9.23e-22	39.8134
EOMES	2.04347	0.0892179	10.0929	2.14e-22	9.35e-22	39.7999
ALDH3A1	2.90182	0.281356	10.0536	3.03e-22	1.31e-21	39.4566
ESPNL	2.5539	0.154187	10.051	3.1e-22	1.34e-21	39.4338
HIST2H2AA3	3.13064	0.110133	10.0379	3.48e-22	1.5e-21	39.3195
VGLL2	3.86222	0.188642	10.0332	3.63e-22	1.56e-21	39.278
H2BFS	3.92233	0.0483937	9.98363	5.61e-22	2.39e-21	38.8474
HOXA9	5.47703	0.254148	9.97823	5.89e-22	2.5e-21	38.8006
ZAR1	2.39765	0.0650501	9.95896	6.97e-22	2.95e-21	38.6336
ZMYND10	2.0258	1.2286	9.94903	7.6e-22	3.21e-21	38.5475
PLSCR2	2.5287	0.02007	9.9443	7.92e-22	3.34e-21	38.5066
LGR6	2.26582	0.853404	9.8902	1.27e-21	5.29e-21	38.0395
PPIAL4D	2.80891	0.0382193	9.86151	1.63e-21	6.75e-21	37.7925
DMP1	2.10987	0.0422808	9.85525	1.72e-21	7.12e-21	37.7387
DRC1	2.75049	0.544857	9.84362	1.91e-21	7.86e-21	37.6388
SLAMF9	2.30167	0.296616	9.833	2.09e-21	8.59e-21	37.5476
AL008723.1	2.86008	0.0509879	9.78143	3.27e-21	1.33e-20	37.1059
ICOS	2.54183	0.0628976	9.75312	4.17e-21	1.68e-20	36.8643
COL6A3	3.87786	0.659209	9.74943	4.31e-21	1.74e-20	36.8328
AC006386.1	2.2852	0.0668399	9.73995	4.68e-21	1.88e-20	36.752
THBS1	2.2973	1.42909	9.70969	6.07e-21	2.43e-20	36.4946
GPR31	2.03501	0.0367412	9.68157	7.73e-21	3.08e-20	36.2558
C2orf91	2.06327	0.0640285	9.66027	9.27e-21	3.68e-20	36.0753
HNRNPCL3	2.99028	0.0159306	9.62624	1.24e-20	4.91e-20	35.7875
C6orf15	5.58838	0.434259	9.62551	1.25e-20	4.94e-20	35.7813
FGFBP2	3.18057	1.02628	9.58121	1.82e-20	7.15e-20	35.4079
PPIAL4F	2.75392	0.0266892	9.55679	2.24e-20	8.75e-20	35.2027
IL2RA	3.43979	0.365369	9.49146	3.9e-20	1.5e-19	34.6555
C9orf135	2.46974	0.208342	9.48694	4.06e-20	1.56e-19	34.6177
TCF23	3.28953	0.154308	9.43117	6.49e-20	2.47e-19	34.153
CXCL8	2.89729	1.48374	9.38255	9.77e-20	3.68e-19	33.7496
HOXB13	4.90673	0.237555	9.37452	1.04e-19	3.93e-19	33.6831
FASLG	2.15095	0.0681051	9.36801	1.1e-19	4.15e-19	33.6292
LGALS9C	2.01084	0.0319642	9.31341	1.74e-19	6.49e-19	33.1786
CCL20	3.18293	0.370262	9.3072	1.83e-19	6.82e-19	33.1275
TREML2	2.01271	0.060101	9.27057	2.49e-19	9.2e-19	32.8265
HBA1	2.04576	1.0581	9.26325	2.64e-19	9.77e-19	32.7665
AQP9	2.45048	0.578676	9.25493	2.83e-19	1.05e-18	32.6983
HOXB5	5.0733	0.172544	9.24542	3.07e-19	1.13e-18	32.6203
XCL1	2.06384	0.0837897	9.19434	4.68e-19	1.71e-18	32.2031
CFAP45	3.1161	0.352632	9.1881	4.93e-19	1.8e-18	32.1522
PGK2	3.24926	0.0171493	9.18205	5.18e-19	1.89e-18	32.1029
CFAP73	2.89339	0.520248	9.16143	6.14e-19	2.23e-18	31.9351
DSG2	2.40143	0.326191	9.14532	7.01e-19	2.54e-18	31.8042
HOXB6	3.3533	0.178925	9.14425	7.07e-19	2.56e-18	31.7955
ABCA13	2.76623	0.108275	9.14118	7.25e-19	2.62e-18	31.7706
SAA2	5.07267	0.37602	9.13107	7.88e-19	2.85e-18	31.6886
KRT75	4.22465	0.208731	9.12511	8.28e-19	2.99e-18	31.6403
MUC3A	2.06211	0.0473702	9.10264	9.95e-19	3.57e-18	31.4583
P2RY10	2.06869	0.0701492	9.0962	1.05e-18	3.76e-18	31.4062
UCN2	2.41517	0.180418	9.07795	1.22e-18	4.35e-18	31.2589
LGALS9B	2.17037	0.0310272	9.07423	1.26e-18	4.48e-18	31.2288
C3orf52	2.08385	0.0900539	9.04751	1.56e-18	5.55e-18	31.0134
HAND2	2.02887	0.371494	9.03348	1.75e-18	6.21e-18	30.9005
RETN	2.65124	0.212476	8.99465	2.4e-18	8.44e-18	30.5888
FPR2	2.22662	0.257511	8.98759	2.54e-18	8.93e-18	30.5322
AGTR1	2.4274	0.155827	8.97665	2.78e-18	9.74e-18	30.4447
PPIAL4E	2.59245	0.0260362	8.9717	2.89e-18	1.01e-17	30.4051
KRT80	2.64569	0.0960729	8.96456	3.07e-18	1.07e-17	30.348
PRAC2	6.30348	0.21231	8.96295	3.11e-18	1.09e-17	30.3352
SLN	2.29083	1.91267	8.96086	3.16e-18	1.1e-17	30.3184
IDO1	3.93499	0.219162	8.91628	4.53e-18	1.57e-17	29.9629
HIST2H4B	2.50709	0.0271198	8.88414	5.87e-18	2.02e-17	29.7075
OCSTAMP	2.07251	0.0309894	8.86991	6.58e-18	2.26e-17	29.5946
SCNN1B	2.54908	0.325801	8.83947	8.4e-18	2.87e-17	29.3537
CD300E	2.5958	0.185068	8.82186	9.68e-18	3.29e-17	29.2145
CATSPERB	2.08048	0.0316976	8.79564	1.19e-17	4.04e-17	29.0078
SRY	4.01766	0.12767	8.72847	2.04e-17	6.82e-17	28.4805
DMBX1	4.18507	0.104727	8.69801	2.59e-17	8.65e-17	28.2425
RPS4Y2	2.01132	0.0411474	8.68952	2.77e-17	9.23e-17	28.1762
ACTG2	2.14387	0.684159	8.67427	3.13e-17	1.04e-16	28.0574
TFPI2	2.9653	0.41489	8.66846	3.28e-17	1.08e-16	28.0122
HOXB8	6.3807	0.215708	8.66043	3.49e-17	1.15e-16	27.9497
BANF2	2.39225	0.0273643	8.65624	3.61e-17	1.19e-16	27.9171
WDR63	2.23715	0.308475	8.65222	3.72e-17	1.23e-16	27.8858
AGR3	4.43541	0.169935	8.65027	3.78e-17	1.25e-16	27.8707
TEKT1	2.47906	0.666831	8.63418	4.29e-17	1.41e-16	27.7458
HCAR2	2.29001	0.11535	8.63106	4.4e-17	1.44e-16	27.7216
ITK	2.68565	0.17061	8.6011	5.57e-17	1.82e-16	27.4895
CYP27B1	3.28365	0.536229	8.57097	7.05e-17	2.28e-16	27.2568
CCDC140	3.68302	0.0523339	8.52578	1e-16	3.22e-16	26.909
MMP7	2.61345	0.567858	8.51081	1.13e-16	3.61e-16	26.7941
HTRA4	2.42163	0.118837	8.50827	1.15e-16	3.68e-16	26.7746
C1orf158	3.30975	0.321082	8.50468	1.18e-16	3.78e-16	26.7471
ARL14EPL	3.09036	0.0489083	8.48537	1.37e-16	4.38e-16	26.5992
SP8	3.26407	0.396451	8.42663	2.17e-16	6.82e-16	26.151
HOXA11	2.04673	0.389134	8.38581	2.97e-16	9.27e-16	25.841
CCR4	2.01602	0.0789336	8.33795	4.28e-16	1.33e-15	25.4791
IL1R2	2.05778	0.343811	8.30391	5.56e-16	1.72e-15	25.2228
IL6	2.16989	0.609848	8.29889	5.78e-16	1.78e-15	25.1851
PRRX2	2.82558	0.310265	8.2628	7.6e-16	2.33e-15	24.9143
TULP1	2.39299	0.0537825	8.25612	8e-16	2.45e-15	24.8643
HIST1H3G	3.26736	0.0857708	8.24856	8.47e-16	2.59e-15	24.8078
WNT16	2.9568	0.295167	8.24603	8.64e-16	2.64e-15	24.7888
GAL	2.16176	0.56507	8.24482	8.72e-16	2.66e-15	24.7798
LMO7DN	2.12097	0.105326	8.16363	1.61e-15	4.85e-15	24.1753
AVIL	2.03082	1.49978	8.1246	2.16e-15	6.46e-15	23.8865
KISS1R	2.34938	0.254519	8.12045	2.23e-15	6.66e-15	23.8559
FNDC7	2.07012	0.215505	8.11001	2.41e-15	7.19e-15	23.7788
APCDD1L	3.37328	0.24275	8.10936	2.42e-15	7.22e-15	23.7741
XXbac-BPG32J3.19	2.24235	0.0715495	8.10753	2.46e-15	7.32e-15	23.7605
HGD	2.12411	0.178173	8.07166	3.21e-15	9.51e-15	23.4965
HOXC5	2.69067	0.0655334	8.0546	3.65e-15	1.08e-14	23.3713
TBX1	2.28247	0.278092	7.93652	8.75e-15	2.53e-14	22.5106
SAA2-SAA4	5.91189	0.240924	7.92548	9.49e-15	2.74e-14	22.4307
MAB21L2	4.12012	0.147861	7.90718	1.09e-14	3.13e-14	22.2984
TNNI1	2.06908	0.0135992	7.88097	1.32e-14	3.77e-14	22.1094
ROPN1L	2.63053	0.415216	7.87549	1.37e-14	3.92e-14	22.07
CARD17	2.20971	0.0312915	7.84438	1.72e-14	4.9e-14	21.8464
UBASH3A	2.39617	0.0745405	7.81493	2.13e-14	6.04e-14	21.6354
STAP1	2.30471	0.112588	7.80742	2.25e-14	6.37e-14	21.5817
MEDAG	2.86858	0.433837	7.70392	4.76e-14	1.32e-13	20.8461
HIST1H1D	2.83399	0.143093	7.69377	5.12e-14	1.42e-13	20.7744
CD70	3.73018	0.260212	7.68398	5.49e-14	1.52e-13	20.7053
PSORS1C2	2.21377	0.0904289	7.66725	6.19e-14	1.71e-13	20.5875
AFP	2.80853	0.080226	7.65995	6.52e-14	1.8e-13	20.5361
ELF5	3.00412	0.0463601	7.64344	7.34e-14	2.02e-13	20.4201
TMPRSS7	3.04344	0.123734	7.62139	8.59e-14	2.36e-13	20.2655
WT1	4.33106	0.108985	7.61492	8.99e-14	2.47e-13	20.2202
ITIH1	2.63296	0.0547075	7.59249	1.06e-13	2.88e-13	20.0634
CFAP100	2.82201	0.288746	7.58812	1.09e-13	2.97e-13	20.0329
CFAP161	2.45874	0.248404	7.58777	1.09e-13	2.98e-13	20.0305
CER1	2.53789	0.108586	7.56263	1.3e-13	3.55e-13	19.8552
PLEKHS1	2.33134	0.205137	7.55941	1.33e-13	3.62e-13	19.8329
SIX6	3.05657	0.258107	7.54133	1.52e-13	4.11e-13	19.7072
TMEM114	2.26208	0.0827702	7.52592	1.69e-13	4.57e-13	19.6004
F8A2	3.29207	0.00648154	7.51693	1.8e-13	4.87e-13	19.5381
MCEMP1	3.25591	0.156634	7.46187	2.65e-13	7.1e-13	19.1581
SSX1	2.35746	0.0162606	7.43285	3.25e-13	8.68e-13	18.9587
PRDM13	4.54205	0.0984465	7.42165	3.52e-13	9.36e-13	18.882
ABCB5	2.66074	0.00824647	7.39417	4.26e-13	1.13e-12	18.6941
GLI1	2.70853	0.398481	7.38981	4.39e-13	1.16e-12	18.6643
NUP62CL	2.33784	0.18737	7.38788	4.45e-13	1.18e-12	18.6512
CCL7	4.2633	0.166275	7.3323	6.54e-13	1.72e-12	18.2732
MARCO	2.71155	0.643708	7.28679	8.95e-13	2.34e-12	17.9655
EBF2	2.70461	0.146745	7.27233	9.88e-13	2.57e-12	17.8681
MEIKIN	2.00809	0.0164676	7.27056	1e-12	2.6e-12	17.8562
MET	2.35492	0.841453	7.26077	1.07e-12	2.78e-12	17.7904
RHAG	2.46022	0.0257489	7.20762	1.54e-12	3.96e-12	17.4342
AREG	2.49025	0.325377	7.1969	1.65e-12	4.25e-12	17.3627
SCNN1G	2.32065	0.152214	7.1731	1.94e-12	4.97e-12	17.204
SPAG17	3.53832	0.114372	7.10818	3.02e-12	7.63e-12	16.7739
NHLH1	2.03042	0.580578	7.07959	3.66e-12	9.2e-12	16.5855
HOXB9	5.43187	0.115643	7.07758	3.71e-12	9.32e-12	16.5722
FAM92B	3.7978	0.133072	7.05439	4.33e-12	1.08e-11	16.42
C7orf33	3.5544	0.0126885	7.02416	5.3e-12	1.32e-11	16.2221
PNLIPRP3	2.6491	0.0200043	7.00223	6.13e-12	1.53e-11	16.079
FEZF1	2.40205	0.226349	6.99128	6.59e-12	1.64e-11	16.0077
SLC7A3	2.10219	0.789363	6.97278	7.46e-12	1.85e-11	15.8875
MMP1	2.21055	0.252013	6.9268	1.01e-11	2.49e-11	15.5898
HIST1H3B	2.76822	0.24344	6.87245	1.44e-11	3.53e-11	15.2401
HCAR3	2.56394	0.0306285	6.84303	1.75e-11	4.25e-11	15.0519
HIST1H2AL	2.67078	0.119624	6.83887	1.8e-11	4.37e-11	15.0253
ADH4	2.08786	0.0289679	6.82584	1.96e-11	4.75e-11	14.9422
IL36B	3.57044	0.0511196	6.82564	1.96e-11	4.75e-11	14.9409
ADGRE3	2.14339	0.0723608	6.82504	1.97e-11	4.77e-11	14.9371
LRRC15	4.18625	0.109396	6.79194	2.44e-11	5.89e-11	14.7266
PITX2	5.47692	0.115814	6.79165	2.45e-11	5.9e-11	14.7247
LIPN	2.42087	0.0384014	6.78625	2.53e-11	6.1e-11	14.6905
NOS2	2.53482	1.03162	6.77367	2.75e-11	6.61e-11	14.6108
HMGA2	5.57483	0.1102	6.76556	2.9e-11	6.95e-11	14.5595
HDC	2.93608	0.0986133	6.76357	2.93e-11	7.04e-11	14.5469
CPA6	2.20761	0.0986226	6.76034	3e-11	7.19e-11	14.5265
C8orf22	3.26273	0.169432	6.7375	3.47e-11	8.3e-11	14.3823
ANKUB1	2.26367	0.100256	6.69961	4.43e-11	1.05e-10	14.1441
CTC-360G5.8	2.55207	0.00340935	6.67973	5.03e-11	1.19e-10	14.0196
LBX1	3.70854	0.10064	6.66414	5.56e-11	1.31e-10	13.9222
CCL23	2.79798	0.0979061	6.64944	6.1e-11	1.44e-10	13.8306
HIST1H1B	3.28267	0.155288	6.63566	6.66e-11	1.57e-10	13.7448
FAM81B	2.36765	0.318021	6.63397	6.73e-11	1.59e-10	13.7343
RIPPLY3	2.30561	0.0751917	6.6275	7.02e-11	1.65e-10	13.6941
CAMP	3.7124	0.169372	6.59429	8.66e-11	2.02e-10	13.4883
ADGRD2	3.43204	0.0795991	6.52339	1.35e-10	3.13e-10	13.0519
CXCL6	3.52921	0.220542	6.51763	1.4e-10	3.24e-10	13.0166
GPR174	2.77314	0.0721278	6.50793	1.49e-10	3.44e-10	12.9573
EBF3	2.58311	0.223428	6.48127	1.76e-10	4.05e-10	12.7946
HNRNPCL4	2.43794	0.00866475	6.46495	1.95e-10	4.47e-10	12.6953
DKK1	2.70026	0.69691	6.44859	2.16e-10	4.94e-10	12.596
XG	2.47752	0.112904	6.3956	3e-10	6.79e-10	12.2759
NPIPA8	2.01895	0.0281645	6.38418	3.22e-10	7.28e-10	12.2071
ALPK2	2.24665	0.142464	6.37791	3.34e-10	7.56e-10	12.1695
HIST1H3C	2.47401	0.200147	6.34483	4.1e-10	9.23e-10	11.9713
WBSCR28	3.0306	0.0757079	6.34202	4.17e-10	9.38e-10	11.9545
CTAGE6	2.50883	0.00371203	6.33476	4.36e-10	9.8e-10	11.9112
MIA	2.00521	0.248196	6.28487	5.91e-10	1.32e-09	11.6144
HIST1H2AJ	3.29873	0.0747143	6.2818	6.02e-10	1.34e-09	11.5962
HIST2H3C	2.1374	0.0781341	6.27504	6.27e-10	1.4e-09	11.5561
MFAP5	2.27356	0.286806	6.2022	9.74e-10	2.15e-09	11.1273
TFAP2B	2.50961	0.120971	6.20045	9.84e-10	2.17e-09	11.117
KCNJ15	2.24388	0.0566681	6.12919	1.51e-09	3.29e-09	10.7019
MAP3K19	2.07471	0.283123	6.12171	1.58e-09	3.43e-09	10.6585
FNDC1	2.06047	0.252605	6.07885	2.03e-09	4.4e-09	10.4111
TNMD	3.18531	0.191842	6.05177	2.38e-09	5.15e-09	10.2556
ZNF280A	2.23734	0.0150766	6.03922	2.57e-09	5.54e-09	10.1838
MCOLN3	2.38443	0.0775495	6.03521	2.63e-09	5.67e-09	10.1608
C11orf88	3.71439	0.146535	6.03371	2.65e-09	5.71e-09	10.1523
SAA4	2.18338	0.0735572	6.01339	2.98e-09	6.42e-09	10.0363
FMO1	2.05036	0.127142	6.0024	3.18e-09	6.84e-09	9.97373
CCR8	2.01022	0.0188425	5.98321	3.56e-09	7.62e-09	9.86473
SSX3	2.64551	0.00375699	5.93368	4.75e-09	1.01e-08	9.58483
CCKAR	2.25174	0.0807546	5.93334	4.76e-09	1.01e-08	9.58292
STMND1	2.29822	0.0481191	5.93139	4.81e-09	1.02e-08	9.57196
SBK2	2.04368	0.031708	5.92633	4.95e-09	1.05e-08	9.54347
HIST1H2AH	2.15714	0.105143	5.9273	4.93e-09	1.05e-08	9.54893
ENTHD1	2.0662	0.0461265	5.91883	5.17e-09	1.1e-08	9.50133
NTF4	2.10059	0.0254198	5.85627	7.41e-09	1.56e-08	9.15158
CFAP57	2.08312	0.210479	5.79057	1.08e-08	2.25e-08	8.78788
HIST1H4F	2.27309	0.0335372	5.76955	1.21e-08	2.52e-08	8.67231
AP003419.11	3.42144	0.00606949	5.74564	1.39e-08	2.88e-08	8.5413
KCNE1B	2.24207	0.0139167	5.72233	1.58e-08	3.27e-08	8.41406
EDDM3A	3.72951	0.029219	5.71702	1.63e-08	3.36e-08	8.38516
HIST1H3F	4.39281	0.0933559	5.70711	1.73e-08	3.55e-08	8.33124
KPNA7	2.01986	0.0444239	5.64458	2.44e-08	4.99e-08	7.99305
BARX1	2.66932	0.201057	5.6216	2.78e-08	5.65e-08	7.86958
IL2	2.83184	0.00458903	5.60103	3.11e-08	6.31e-08	7.75951
POU2F3	2.14465	0.027155	5.59787	3.17e-08	6.41e-08	7.74263
C20orf141	2.85715	0.0242173	5.58014	3.49e-08	7.05e-08	7.64807
STOML3	4.69411	0.106801	5.54707	4.18e-08	8.41e-08	7.47241
TP63	2.33998	0.11872	5.51843	4.89e-08	9.8e-08	7.32107
FOXA2	4.35617	0.0760182	5.49574	5.53e-08	1.11e-07	7.2017
ITLN2	2.04204	0.0418763	5.45872	6.76e-08	1.34e-07	7.00789
ORM1	2.79463	0.0890231	5.4077	8.89e-08	1.75e-07	6.74271
LRRIQ1	2.27651	0.13132	5.37581	1.05e-07	2.07e-07	6.57815
LIMS3	3.40181	0.00227868	5.37408	1.06e-07	2.09e-07	6.56922
RFPL4A	3.36948	0.0100056	5.35786	1.16e-07	2.27e-07	6.48589
ERVV-1	2.28687	0.0119196	5.32807	1.36e-07	2.65e-07	6.33343
IRG1	2.11951	0.00566891	5.31458	1.46e-07	2.84e-07	6.26463
ALDH1A3	2.46868	0.417559	5.27298	1.81e-07	3.51e-07	6.05351
CDHR4	3.26957	0.0695983	5.27165	1.83e-07	3.53e-07	6.04682
RASSF9	2.52932	0.297926	5.2583	1.96e-07	3.79e-07	5.97938
BMP5	3.42388	0.14882	5.25642	1.98e-07	3.82e-07	5.96993
FOXB1	2.64356	0.060015	5.24324	2.12e-07	4.09e-07	5.90355
HIST1H2BM	2.16422	0.0678896	5.18201	2.91e-07	5.57e-07	5.59723
NTRK1	2.25045	0.31106	5.16009	3.25e-07	6.22e-07	5.48835
CSF2	3.4905	0.02208	5.06564	5.27e-07	9.94e-07	5.02417
CR1	2.36631	0.106871	5.0611	5.39e-07	1.02e-06	5.00207
GOLT1A	2.64176	0.482208	5.03932	6.02e-07	1.13e-06	4.89623
CAPSL	2.62497	0.331133	5.03537	6.14e-07	1.15e-06	4.87708
CAPN6	6.86599	0.123975	5.02762	6.38e-07	1.2e-06	4.83954
AGXT	3.47184	0.0308429	5.01676	6.74e-07	1.26e-06	4.78704
C5orf46	5.03381	0.0783444	5.00496	7.15e-07	1.34e-06	4.73013
CWH43	2.64018	0.0296183	5.00294	7.22e-07	1.35e-06	4.72041
UNCX	3.66515	0.0311887	5.00359	7.2e-07	1.35e-06	4.72353
PRAME	5.08434	0.16165	5.00063	7.3e-07	1.36e-06	4.70928
HIST1H3I	3.67714	0.0702337	4.99534	7.5e-07	1.4e-06	4.68384
MMP8	2.81328	0.0364614	4.99494	7.51e-07	1.4e-06	4.6819
DPPA4	2.94049	0.0587775	4.94543	9.61e-07	1.78e-06	4.44488
CPA1	2.53626	0.0478176	4.93813	9.97e-07	1.85e-06	4.41014
HIST1H3J	2.00281	0.120285	4.92759	1.05e-06	1.94e-06	4.36001
MMP13	6.71071	0.107917	4.92477	1.06e-06	1.97e-06	4.34661
HIST1H4D	2.04614	0.215517	4.89213	1.25e-06	2.3e-06	4.19218
IFNB1	2.11544	0.0135108	4.88615	1.29e-06	2.37e-06	4.16399
CCL13	3.44229	0.147528	4.86243	1.45e-06	2.66e-06	4.05248
C15orf53	2.03193	0.00270186	4.84713	1.56e-06	2.86e-06	3.98082
CCL18	4.00943	0.468151	4.82502	1.73e-06	3.17e-06	3.87761
HCRT	2.92819	0.108323	4.76304	2.34e-06	4.24e-06	3.59071
H1FOO	3.56656	0.0122958	4.73998	2.61e-06	4.72e-06	3.48483
EREG	3.39222	0.0708705	4.7387	2.63e-06	4.75e-06	3.47899
AKAP14	2.11799	0.262864	4.73777	2.64e-06	4.77e-06	3.47471
NPPB	2.19031	0.153239	4.7095	3.02e-06	5.44e-06	3.34563
CRABP1	2.37373	0.930685	4.67391	3.57e-06	6.4e-06	3.18419
BARHL2	2.70114	0.0379268	4.66914	3.65e-06	6.54e-06	3.16264
TNFSF11	2.06297	0.0221818	4.64799	4.04e-06	7.21e-06	3.0673
HIST1H2BI	4.92695	0.0570244	4.60856	4.85e-06	8.63e-06	2.89069
HIST1H2AB	2.1105	0.121921	4.58217	5.49e-06	9.72e-06	2.77331
PIH1D3	3.70292	0.0575455	4.57129	5.77e-06	1.02e-05	2.72508
SCN4A	2.11023	0.0518967	4.56859	5.84e-06	1.03e-05	2.71314
KRT32	2.41851	0.0160111	4.51249	7.57e-06	1.33e-05	2.46633
FOXA1	2.44277	0.0684363	4.48281	8.66e-06	1.52e-05	2.33691
DIRC1	3.30965	0.0120995	4.4773	8.88e-06	1.55e-05	2.31294
LA16c-380H5.3	5.31191	0.25298	4.46735	9.29e-06	1.62e-05	2.2698
IL22RA2	2.08381	0.00483498	4.45673	9.75e-06	1.7e-05	2.22383
PRAMEF12	2.12493	0.0110981	4.42274	1.14e-05	1.97e-05	2.07745
NKX2-1	2.02202	0.104663	4.39781	1.27e-05	2.2e-05	1.97071
HIST1H4B	2.19746	0.106446	4.39709	1.28e-05	2.21e-05	1.96763
LYZL2	2.491	0.00377207	4.38215	1.36e-05	2.35e-05	1.904
USP29	2.66862	0.010946	4.35647	1.53e-05	2.63e-05	1.79503
GABRR1	3.27975	0.0333642	4.32694	1.74e-05	2.99e-05	1.67049
PLEKHN1	2.39806	0.0610116	4.32435	1.76e-05	3.02e-05	1.65961
DLK1	3.10605	0.246423	4.29322	2.02e-05	3.45e-05	1.52923
WDR72	3.33762	0.0452985	4.28894	2.06e-05	3.51e-05	1.51138
FBP2	3.70032	0.0367979	4.27493	2.19e-05	3.73e-05	1.45309
2019-09-14	8.33347	0.143495	4.2697	2.24e-05	3.81e-05	1.43134
AC104389.1	2.55275	0.00804542	4.23722	2.58e-05	4.37e-05	1.29699
C21orf140	2.47545	0.00342533	4.19944	3.04e-05	5.13e-05	1.14195
SERPINB7	2.38969	0.00927893	4.19299	3.12e-05	5.26e-05	1.1156
TBX20	3.54459	0.0219161	4.14846	3.78e-05	6.34e-05	0.934838
FAM216B	3.22426	0.0899718	4.12622	4.15e-05	6.95e-05	0.845193
MS4A6E	3.19458	0.051951	4.09549	4.73e-05	7.88e-05	0.722143
C4BPA	3.19186	0.111726	4.07663	5.12e-05	8.51e-05	0.647066
CCDC33	2.957	0.0938237	4.0656	5.36e-05	8.9e-05	0.603291
GDF3	4.75083	0.0317135	4.02522	6.34e-05	0.000104649	0.444031
RHOXF2B	2.02359	0.00406422	3.97414	7.83e-05	0.000128336	0.244731
SLC17A1	3.53459	0.0256372	3.94486	8.83e-05	0.00014421	0.131606
REG1A	2.16025	0.0519618	3.923	9.65e-05	0.000157207	0.0476515
SLC15A1	2.07846	0.0191341	3.90544	0.000103574	0.000168465	-0.0194709
RHBG	3.91	0.114338	3.87724	0.00011604	0.000187998	-0.126631
PAGE5	2.2341	0.0182092	3.87497	0.000117103	0.000189642	-0.135225
PHOX2B	2.7082	0.0116486	3.86787	0.000120489	0.00019495	-0.162092
TMEM190	2.42641	0.111984	3.86595	0.000121418	0.000196372	-0.169327
CGA	2.52081	0.0249117	3.85555	0.000126582	0.000204472	-0.208566
MAGEB1	2.55695	0.00175059	3.84246	0.000133376	0.000215026	-0.257814
DEFA3	2.33028	0.101481	3.82612	0.000142336	0.000229041	-0.319026
RP5-860F19.8	2.65944	0.00188938	3.80283	0.000156098	0.00025029	-0.405876
ANKRD66	3.14258	0.0618991	3.798	0.000159103	0.000255025	-0.423809
DMRT1	2.4767	0.0313286	3.78563	0.000167057	0.000267254	-0.469687
OBP2A	2.27253	0.0770743	3.77147	0.000176617	0.000282159	-0.521998
IL21	2.95662	0.00205118	3.75619	0.000187516	0.000299087	-0.578262
CPXCR1	3.34062	0.0142279	3.73901	0.000200521	0.000318877	-0.641242
DPT	2.31716	0.216201	3.7307	0.000207113	0.000328964	-0.671613
GUCA2A	5.81734	0.0535558	3.72215	0.000214108	0.000339527	-0.702788
HES2	2.35571	0.0500716	3.72197	0.000214255	0.000339734	-0.703435
HIST1H4L	4.20619	0.0321329	3.69165	0.000240908	0.000380651	-0.813424
DCAF8L1	2.16801	0.0013649	3.67798	0.000253916	0.000400755	-0.862724
HIST2H3A	2.40733	0.00797186	3.66617	0.000265689	0.000418668	-0.905197
DNAH3	2.171	0.0168584	3.65803	0.000274094	0.000431087	-0.934375
SERPINB2	2.05726	0.113092	3.65666	0.000275537	0.000433288	-0.939294
RHOXF2	2.01457	0.00953859	3.64475	0.000288349	0.00045257	-0.981857
TMEM212	2.0205	0.0203789	3.61053	0.000328363	0.000513699	-1.10347
OR2J2	2.84724	0.00581243	3.59531	0.000347776	0.000542866	-1.15718
IL31RA	4.16418	0.0455305	3.59196	0.000352199	0.00054938	-1.169
RP11-812E19.9	2.57215	0.013891	3.5916	0.000352668	0.000550023	-1.17024
RGS13	2.0426	0.0184079	3.56046	0.000396369	0.000615895	-1.27938
KRTAP13-4	3.12554	0.00247705	3.54071	0.000426662	0.000661561	-1.34813
ADGB	2.99628	0.0253717	3.46798	0.000557901	0.000857448	-1.59811
IGF2BP1	5.78632	0.0324444	3.46216	0.000569874	0.00087512	-1.61787
APELA	3.91469	0.0216026	3.45309	0.000589036	0.000903332	-1.64865
TUBA4B	2.95864	0.0647783	3.4483	0.000599393	0.000918858	-1.66486
ZCCHC5	3.03971	0.0137512	3.41439	0.000677733	0.00103334	-1.77907
FGF19	4.40649	0.0212949	3.37963	0.000767876	0.00116601	-1.89502
KISS1	3.22587	0.198451	3.37782	0.000772861	0.0011734	-1.90102
DBX1	2.22254	0.0246342	3.37319	0.000785762	0.00119216	-1.91638
CABP2	2.44324	0.00844535	3.35416	0.000840875	0.00127353	-1.97925
FCAMR	2.75694	0.0213682	3.34821	0.00085883	0.00129933	-1.99883
RFPL4AL1	4.00651	0.00287034	3.34693	0.000862736	0.00130504	-2.00304
APOBEC4	3.02003	0.0136897	3.33772	0.000891362	0.0013472	-2.03328
SIM1	3.91994	0.0114156	3.31152	0.000977656	0.00147301	-2.11885
LIMS3L	4.36105	0.00140897	3.30967	0.000984043	0.00148241	-2.12488
MAGEC2	4.70624	0.045131	3.29707	0.00102853	0.0015473	-2.16579
REG1B	3.90323	0.0184649	3.28913	0.00105751	0.00158887	-2.19149
OTOR	3.32338	0.049772	3.27988	0.00109221	0.00163898	-2.22133
COL2A1	2.97917	0.251549	3.26554	0.00114815	0.00171939	-2.26749
CNGA2	2.14011	0.00206982	3.26544	0.00114854	0.00171972	-2.26781
CXCL13	2.29415	0.464325	3.26372	0.00115541	0.00172974	-2.27331
LLfos-48D6.2	2.26879	0.00135962	3.2483	0.00121887	0.00182157	-2.32269
IL5RA	3.46886	0.0479906	3.21944	0.00134634	0.00200675	-2.41446
OR9K2	3.57934	0.0011731	3.19879	0.00144501	0.00214735	-2.47964
CLRN1	5.14109	0.0229304	3.1927	0.00147537	0.00219082	-2.4988
COMP	2.34375	0.0844518	3.17978	0.00154168	0.00228603	-2.53928
HOXB1	2.80104	0.00497805	3.15678	0.00166665	0.0024643	-2.61099
HMX3	2.42091	0.025449	3.13804	0.00177536	0.00261974	-2.66906
FGF3	3.91378	0.0502572	3.12474	0.00185638	0.00273562	-2.71005
MMP12	2.33118	0.146249	3.10789	0.00196394	0.00288765	-2.76175
DEFA4	2.11077	0.0362722	3.09334	0.00206133	0.00302522	-2.80615
IFNG	4.28879	0.0318755	3.08386	0.00212721	0.0031182	-2.83499
KRTAP2-3	2.196	0.00298833	3.0707	0.00222187	0.00325309	-2.87488
OLIG3	3.81266	0.0147481	3.02401	0.00258969	0.00377263	-3.01503
C4orf22	2.13003	0.0235662	3.01841	0.00263735	0.00384064	-3.0317
FGF7	2.05609	0.0655361	3.0076	0.00273171	0.00397365	-3.0638
RTP3	2.98011	0.0136931	2.96893	0.00309498	0.00447997	-3.1777
LIN28B	2.15004	0.0412252	2.96293	0.00315518	0.00456377	-3.19525
ZP4	2.21754	0.00137358	2.95791	0.00320628	0.00463598	-3.20989
NRK	3.7182	0.0209674	2.95141	0.0032736	0.00472883	-3.22881
CYLC1	2.26806	0.00127155	2.94818	0.00330756	0.00477613	-3.23821
HIST1H2BB	2.71364	0.0593823	2.92758	0.00353184	0.00508884	-3.2979
H2AFB3	3.12188	0.00147132	2.92393	0.00357295	0.0051447	-3.30843
ODAM	2.00395	0.01039	2.90203	0.0038291	0.00549949	-3.37134
CTAGE4	2.30491	0.00325215	2.8777	0.00413329	0.00591959	-3.44072
MEOX1	5.10406	0.0492151	2.85844	0.00438934	0.00627402	-3.4952
KLF14	2.62503	0.013699	2.83284	0.00475215	0.0067691	-3.56709
NTS	3.28559	0.201807	2.82076	0.0049326	0.00701654	-3.6008
PRG4	2.71353	0.162772	2.8124	0.00506119	0.00719323	-3.62406
CLC	2.01307	0.0541217	2.80851	0.00512189	0.00727479	-3.63483
PAEP	5.4558	0.0380657	2.77967	0.00559389	0.00792013	-3.71439
CD1B	2.28044	0.0184113	2.77033	0.00575491	0.00813879	-3.73998
CYP4F22	2.64736	0.0215128	2.72186	0.00666003	0.00936919	-3.87143
TMEM207	3.20611	0.00111273	2.71665	0.0067646	0.00951021	-3.88543
CU104787.1	2.50003	0.0116385	2.69182	0.00728352	0.0102107	-3.95177
HOXC12	6.47886	0.0247833	2.68273	0.00748235	0.0104805	-3.97592
OR51B6	2.21019	0.0014736	2.68171	0.00750492	0.0105106	-3.97862
UGT2B7	2.86214	0.0253817	2.66798	0.00781514	0.0109265	-4.0149
PRAMEF2	2.37277	0.00101974	2.65281	0.0081713	0.0114083	-4.05479
CSN3	4.05177	0.00135944	2.65028	0.00823224	0.0114893	-4.06144
HIST1H4G	2.7523	0.00363544	2.64861	0.00827261	0.0115432	-4.06581
CCL11	7.03043	0.0277976	2.6443	0.00837754	0.0116838	-4.07708
PRAC1	4.57095	0.0495328	2.63335	0.00864953	0.0120462	-4.10563
AC073130.2	2.26249	0.014242	2.58308	0.0100027	0.0138449	-4.23527
UGT2B15	2.05232	0.00634619	2.54699	0.0110879	0.0152933	-4.32684
XAGE1B	2.37044	0.000972415	2.52184	0.0119047	0.0163764	-4.38989
KERA	3.51834	0.0319647	2.49485	0.0128405	0.0176097	-4.45688
CA6	2.06886	0.0232981	2.47267	0.0136577	0.0186773	-4.5114
DAZ2	2.82426	0.00162685	2.4703	0.0137478	0.018794	-4.5172
BECN2	2.33647	0.00571819	2.45836	0.0142088	0.019392	-4.5463
MYO3A	3.13261	0.0432841	2.45787	0.0142283	0.0194173	-4.54751
GCGR	3.01257	0.0415677	2.45735	0.0142485	0.0194409	-4.54877
TGM7	2.05524	0.0122263	2.44818	0.0146131	0.0199108	-4.57103
ANKRD60	2.62419	0.00356044	2.36448	0.0183392	0.0247522	-4.77047
TAAR1	2.98667	0.000964337	2.33416	0.0198819	0.0267411	-4.84105
OR4C6	3.84349	0.00180796	2.31571	0.0208748	0.0280231	-4.88353
LHX8	3.80192	0.0323029	2.30304	0.0215815	0.0289384	-4.91252
EPYC	7.1162	0.026407	2.30129	0.0216809	0.0290658	-4.91652
RP11-166N6.3	3.43034	0.0109269	2.2952	0.0220294	0.029505	-4.93039
SCGB2A1	2.85574	0.0520151	2.27611	0.0231537	0.0309458	-4.97363
SSX4B	2.96943	0.000761117	2.24779	0.0249137	0.0331829	-5.03713
SNTN	3.30994	0.0102664	2.24399	0.0251581	0.0334888	-5.04558
XAGE1A	2.86692	0.000930758	2.23362	0.0258371	0.0343463	-5.06861
OR2A5	2.22715	0.000907794	2.22926	0.026127	0.034706	-5.07825
PAX2	2.14464	0.0804557	2.21921	0.026806	0.0355625	-5.1004
CSN1S1	2.59219	0.0436987	2.19266	0.0286743	0.0379113	-5.15848
OR4F16	2.4673	0.00082666	2.17797	0.0297561	0.0392916	-5.19033
ATP6V1G3	2.68372	0.00545655	2.17222	0.0301884	0.0398331	-5.20272
CFHR5	2.20249	0.0115068	2.16003	0.0311239	0.0410099	-5.22891
IL26	2.03979	0.0254935	2.1498	0.0319275	0.042024	-5.25077
DAZ3	5.01478	0.00137409	2.13923	0.0327776	0.043097	-5.27327
AKR1D1	2.31566	0.0150395	2.13239	0.0333374	0.0437922	-5.28776
SULT1E1	2.40476	0.0271394	2.11138	0.0351093	0.0459869	-5.332
SPP2	3.67541	0.00807933	2.10339	0.0358036	0.0468169	-5.34869

## Sheet: up-DEGs (254) in CGGA
Supplementary Dataset 1
Differentially upregulated genes in high-exp group compared with low-exp group.
GeneID	logFC	AveExpr	t	P.Value	adj.P.Val	B
HOXA5	4.11068	0.780373	11.9874	6.99654e-27	3.25706e-23	50.3304
S100A4	2.24123	1.37872	11.6366	1.1063e-25	2.57505e-22	47.6166
TIMP1	3.59229	5.38342	11.512	2.9293e-25	4.95876e-22	46.6595
TUBA1C	2.28301	3.25732	11.3955	7.26238e-25	9.01552e-22	45.7671
HOXA4	4.4318	0.718868	11.2667	1.97484e-24	1.67152e-21	44.7839
EMP3	2.24035	3.69128	11.1427	5.15057e-24	3.09383e-21	43.8419
GPX8	2.4747	1.30261	11.0648	9.39292e-24	4.9973e-21	43.2514
EN2	2.10639	0.75886	10.8193	6.16801e-23	2.29709e-20	41.4023
IFI30	2.03499	4.85394	10.821	6.08799e-23	2.29709e-20	41.4151
CHI3L1	4.13127	5.74335	10.6905	1.64472e-22	4.93973e-20	40.4388
TNFRSF12A	2.0175	3.46605	10.6429	2.36233e-22	6.76753e-20	40.0831
MMP14	2.00096	4.43146	10.5862	3.62961e-22	9.79522e-20	39.6612
IGFBP2	2.17095	4.93621	10.4183	1.28767e-21	2.75606e-19	38.4175
SLC11A1	2.05144	2.24562	10.2188	5.7399e-21	9.37568e-19	36.9498
COL4A1	2.31428	4.37075	10.1408	1.02601e-20	1.48258e-18	36.3795
COL4A2	2.18486	4.41461	10.0589	1.88385e-20	2.38634e-18	35.7829
COL5A2	2.1298	3.05624	10.0344	2.2594e-20	2.73197e-18	35.6045
HOXD10	2.74382	0.824771	10.0111	2.68404e-20	3.14337e-18	35.4354
ADAM12	2.32716	1.00403	9.98456	3.26556e-20	3.66314e-18	35.2429
HOXA2	3.64325	0.557137	9.96811	3.68722e-20	4.01519e-18	35.1237
PCOLCE	2.67404	2.76737	9.96182	3.86235e-20	4.13772e-18	35.0781
NAMPT	2.15979	5.05763	9.88339	6.88116e-20	6.7086e-18	34.5113
GDF15	2.69394	1.54309	9.8743	7.35669e-20	7.01894e-18	34.4457
NNMT	2.82706	2.44305	9.85433	8.51901e-20	7.97148e-18	34.3017
G0S2	3.54872	1.46033	9.82779	1.03498e-19	9.40114e-18	34.1107
KDELR3	2.28803	0.943739	9.82122	1.08605e-19	9.76976e-18	34.0634
METTL7B	2.52779	3.06918	9.81327	1.15121e-19	1.03061e-17	34.0062
COL1A2	2.90355	4.17637	9.71733	2.32126e-19	1.93831e-17	33.318
COL1A1	3.33989	3.42844	9.70557	2.52912e-19	2.08383e-17	33.2338
LOXL2	2.08016	2.5574	9.70311	2.57498e-19	2.09383e-17	33.2162
MYO1G	2.00803	0.991946	9.67058	3.26316e-19	2.56385e-17	32.9838
TNFAIP6	2.03041	1.60272	9.59456	5.66841e-19	4.15557e-17	32.442
SYNPO	2.11441	2.1444	9.58327	6.1515e-19	4.43981e-17	32.3617
CD248	2.28357	2.28139	9.55617	7.48569e-19	5.20116e-17	32.1692
ANXA2	2.04652	0.556384	9.5164	9.97907e-19	6.68418e-17	31.8871
HOXD11	2.6594	0.764771	9.49488	1.16554e-18	7.56223e-17	31.7348
COL3A1	3.01364	3.66733	9.4898	1.20902e-18	7.79004e-17	31.6989
CLEC5A	2.65205	1.04521	9.42636	1.90905e-18	1.14672e-16	31.2508
FCGBP	2.08245	2.16097	9.41533	2.06651e-18	1.23731e-16	31.1731
EN1	2.49082	0.809819	9.35866	3.10318e-18	1.78899e-16	30.7743
HOXA6	2.55826	0.45971	9.32582	3.92548e-18	2.18851e-16	30.5438
STEAP3	2.79288	0.271866	9.24396	7.03936e-18	3.68202e-16	29.9711
PLAUR	2.3742	0.464118	9.21678	8.54142e-18	4.3695e-16	29.7814
HK3	2.04839	1.11645	9.18331	1.08336e-17	5.37889e-16	29.5483
COL6A2	2.59451	2.40646	9.15362	1.33713e-17	6.37874e-16	29.342
MMP11	2.39951	1.24643	9.06628	2.47887e-17	1.06603e-15	28.7369
PTX3	3.28743	2.0718	8.90629	7.61757e-17	2.86559e-15	27.6366
HMOX1	2.11163	4.73211	8.88376	8.91478e-17	3.28068e-15	27.4825
FN1	2.22254	1.09717	8.88179	9.03827e-17	3.31956e-15	27.469
HTRA3	2.30057	1.10638	8.87983	9.16277e-17	3.35206e-15	27.4556
STC1	2.49919	1.17081	8.81926	1.39681e-16	4.92612e-15	27.0425
STAC	2.66708	0.847985	8.71841	2.80897e-16	9.39065e-15	26.3581
HSPA6	2.45896	1.1833	8.71039	2.96883e-16	9.90728e-15	26.3039
CD163	2.50059	0.832303	8.70628	3.05417e-16	1.00841e-14	26.2761
SRPX2	2.06195	1.8309	8.68826	3.45836e-16	1.11997e-14	26.1544
PDLIM4	2.40863	0.831793	8.58787	6.89388e-16	2.09073e-14	25.4788
DMRTA2	2.49528	0.840573	8.58529	7.0167e-16	2.11763e-14	25.4615
FABP5	2.10527	4.93995	8.54643	9.15263e-16	2.68819e-14	25.2013
S100A9	2.45165	3.61436	8.52853	1.03422e-15	2.99974e-14	25.0816
SPP1	2.03964	3.76123	8.47965	1.44291e-15	4.02826e-14	24.7556
PHLDA2	2.06858	0.971078	8.47325	1.50712e-15	4.18867e-14	24.713
LUM	3.22618	2.38927	8.43909	1.90058e-15	5.18166e-14	24.4859
THBD	2.11848	1.48606	8.39503	2.56147e-15	6.75597e-14	24.1938
SEC61G	2.39239	3.78721	8.33612	3.81242e-15	9.75152e-14	23.8046
HOXB7	2.03861	0.884004	8.31491	4.39724e-15	1.1065e-13	23.665
HOXC10	3.07938	0.732146	8.30029	4.85173e-15	1.20459e-13	23.5687
SOCS3	2.10408	3.00727	8.29965	4.87265e-15	1.20817e-13	23.5645
CA3	3.75967	1.47102	8.22067	8.27201e-15	1.92541e-13	23.0467
IBSP	3.46415	1.28117	8.14266	1.39121e-14	3.06941e-13	22.5381
HOXA1	2.1876	0.0461576	8.07563	2.1698e-14	4.59134e-13	22.1035
MMP9	3.11529	1.95351	8.06191	2.3758e-14	4.97076e-13	22.0148
SERPINE1	2.27291	3.3903	8.05778	2.44152e-14	5.07842e-13	21.9881
FMOD	2.43015	1.14363	8.03609	2.8173e-14	5.70228e-13	21.8481
MEOX2	2.88688	0.979857	8.03527	2.83251e-14	5.72358e-13	21.8429
RASEF	2.64689	0.396763	7.98665	3.90106e-14	7.60645e-13	21.5299
S100A8	2.43916	2.78373	7.91304	6.31939e-14	1.16163e-12	21.0584
LOX	3.14382	0.555746	7.86282	8.76897e-14	1.56856e-12	20.7382
HOXA7	2.70706	0.371684	7.82733	1.10448e-13	1.93752e-12	20.5127
ANPEP	2.18182	1.33275	7.67411	2.96897e-13	4.65756e-12	19.5468
HOXB3	2.49045	0.672828	7.62811	3.98603e-13	6.04434e-12	19.2591
IL7R	2.04692	0.826541	7.61675	4.28595e-13	6.45179e-12	19.1882
RARRES2	2.35079	2.99684	7.61239	4.40704e-13	6.61008e-12	19.161
DPP4	2.22603	0.883072	7.55577	6.32006e-13	9.09473e-12	18.8091
THBS1	2.51499	2.38521	7.48867	9.66854e-13	1.33559e-11	18.3941
HOXD13	2.33322	0.540256	7.47979	1.02264e-12	1.40743e-11	18.3393
SHOX2	3.12104	0.0631313	7.40649	1.62213e-12	2.14682e-11	17.8892
HS3ST3B1	2.25779	0.487566	7.37969	1.91886e-12	2.49171e-11	17.7253
MYBPH	3.83402	0.684616	7.33231	2.57986e-12	3.27022e-11	17.4365
ADAMTS2	2.33869	0.81746	7.33213	2.58274e-12	3.27165e-11	17.4355
PLA2G5	2.1556	1.51701	7.32757	2.65722e-12	3.35231e-11	17.4077
HAMP	2.06416	2.21004	7.30542	3.05022e-12	3.81451e-11	17.2732
HOXC9	2.37854	0.431786	7.25751	4.10653e-12	4.99137e-11	16.9832
F13A1	2.44449	2.78246	7.23765	4.64355e-12	5.58575e-11	16.8634
DDIT4L	2.16792	1.15921	7.14837	8.0468e-12	9.26078e-11	16.3275
BCAT1	2.21122	0.107998	7.10017	1.08081e-11	1.21524e-10	16.04
C6orf141	2.37602	0.623269	7.04241	1.53645e-11	1.67018e-10	15.6973
COL5A1	2.69147	0.264825	7.01717	1.79072e-11	1.91528e-10	15.5482
CHRNA9	2.46158	0.801254	7.00573	1.91919e-11	2.03747e-10	15.4807
HOXA3	4.62958	0.0108822	6.92825	3.06245e-11	3.13674e-10	15.0256
ESM1	2.14602	0.643254	6.9159	3.29816e-11	3.35784e-10	14.9535
LTF	4.00836	0.737351	6.90189	3.58734e-11	3.64429e-10	14.8716
IL2RA	2.66583	0.674023	6.89246	3.79589e-11	3.83315e-10	14.8166
DES	2.01684	0.926166	6.88497	3.97003e-11	3.99168e-10	14.773
MGC12916	2.57771	0.179128	6.82444	5.69696e-11	5.56574e-10	14.4215
MEDAG	2.87621	0.628138	6.81706	5.95252e-11	5.79717e-10	14.3788
OR51E1	2.14206	0.437172	6.79641	6.72906e-11	6.50243e-10	14.2595
CD300E	2.58202	0.450816	6.74196	9.28691e-11	8.79612e-10	13.9461
MMP7	3.62409	0.867731	6.72132	1.04879e-10	9.8188e-10	13.8278
IGFBP3	2.71025	0.637219	6.71457	1.09131e-10	1.01607e-09	13.7892
AQP9	3.11219	0.822297	6.70206	1.17465e-10	1.08552e-09	13.7176
TDO2	2.46532	0.899057	6.6715	1.40534e-10	1.2784e-09	13.5433
EBF2	2.04021	0.367605	6.61851	1.91534e-10	1.70079e-09	13.2423
TLE6	2.27228	0.0313131	6.61199	1.9895e-10	1.75993e-09	13.2054
ACTG2	2.12863	0.731248	6.6061	2.05886e-10	1.81783e-09	13.1721
HOXC13	2.91532	0.315487	6.56344	2.63756e-10	2.2897e-09	12.9314
CNPY1	2.373	0.467217	6.41124	6.32554e-10	5.17976e-09	12.0818
LILRB3	2.20434	0.11022	6.41029	6.36019e-10	5.20356e-09	12.0765
HOXB4	2.61901	0.431379	6.40767	6.45559e-10	5.27235e-09	12.0621
SPOCD1	2.28281	0.127188	6.36505	8.22592e-10	6.59187e-09	11.8269
HOXC11	2.49484	0.350469	6.3141	1.09734e-09	8.54603e-09	11.5473
NKX2-5	3.58493	0.0638482	6.2193	1.86779e-09	1.38954e-08	11.0315
SAA2	5.45391	0.457029	6.19012	2.19747e-09	1.61099e-08	10.8739
SLPI	2.73885	2.39281	6.10035	3.61121e-09	2.53752e-08	10.3925
PI3	4.5816	0.961894	6.09227	3.77541e-09	2.64193e-08	10.3495
TREM1	2.74767	0.325865	6.06358	4.4195e-09	3.04686e-08	10.1969
RARRES1	2.01848	0.807164	6.05985	4.51075e-09	3.10632e-08	10.1771
IL8	3.28947	1.96069	6.03985	5.03251e-09	3.42259e-08	10.0711
BCL2A1	2.15831	0.501034	6.03291	5.22703e-09	3.54065e-08	10.0344
MMP19	2.5334	0.0682169	6.00519	6.07982e-09	4.06507e-08	9.88812
CLCF1	2.25656	0.110455	5.96132	7.71473e-09	5.05653e-08	9.65763
GJB2	2.09723	1.25417	5.95743	7.87875e-09	5.15496e-08	9.63728
CCDC19	2.1769	0.563015	5.95259	8.08787e-09	5.28807e-08	9.61193
HP	5.54052	0.24555	5.93868	8.71927e-09	5.66707e-08	9.5392
PRF1	2.21588	0.066934	5.87488	1.22889e-08	7.78341e-08	9.20729
EYA4	2.06386	0.0541397	5.81503	1.69147e-08	1.04348e-07	8.89844
MARCO	2.92588	0.848366	5.80115	1.82086e-08	1.11644e-07	8.8272
HOXC8	3.08451	0.310264	5.71675	2.84348e-08	1.68787e-07	8.39663
TCTEX1D1	2.55344	1.00573	5.71288	2.90178e-08	1.72028e-07	8.37703
SCNN1B	2.32512	0.425376	5.67086	3.61584e-08	2.11532e-07	8.16464
KCTD14	3.4157	0.0338334	5.65624	3.90229e-08	2.27027e-07	8.09105
HPD	2.01064	0.0283554	5.62283	4.6428e-08	2.65684e-07	7.92339
IGF2BP2	2.05301	0.0957473	5.62096	4.68799e-08	2.68023e-07	7.91404
ARL14EPL	2.02741	0.128653	5.58282	5.7109e-08	3.21173e-07	7.72365
CCL7	4.6182	0.393716	5.56844	6.15023e-08	3.43399e-07	7.65217
C15orf48	3.06617	0.141394	5.4207	1.30667e-07	6.89669e-07	6.92601
FAM183A	3.17119	0.655035	5.40922	1.38462e-07	7.27703e-07	6.87022
CXCL6	4.90267	0.503207	5.33879	1.97141e-07	1.01045e-06	6.53017
COL8A1	2.26201	0.102276	5.26955	2.78079e-07	1.38712e-06	6.19936
CHRDL2	2.38659	0.0684052	5.26517	2.84163e-07	1.41444e-06	6.17856
C7orf57	2.71355	0.248877	5.26459	2.84975e-07	1.4181e-06	6.17582
POSTN	3.03929	0.401608	5.22836	3.40674e-07	1.67159e-06	6.00424
COL13A1	2.08421	0.0176019	5.22076	3.53631e-07	1.73152e-06	5.96838
CCDC164	2.21234	0.742245	5.18905	4.13042e-07	1.99514e-06	5.8192
FAM19A3	2.53452	0.040698	5.1586	4.79151e-07	2.28659e-06	5.67663
GATA4	2.89173	0.189735	5.14702	5.06878e-07	2.40351e-06	5.62263
ALDH1A3	2.34179	0.830807	5.12896	5.53287e-07	2.60434e-06	5.53854
KRT75	2.0999	0.269392	5.09886	6.39904e-07	2.98115e-06	5.39898
SLAMF9	2.3495	0.134703	5.09073	6.65479e-07	3.09025e-06	5.36138
PPBP	2.41339	0.40446	5.0861	6.80474e-07	3.15516e-06	5.34001
C5orf46	3.1429	0.151525	5.0814	6.9603e-07	3.21474e-06	5.31833
SAA1	4.38893	0.203844	5.04934	8.11745e-07	3.69572e-06	5.17084
AREG	2.40447	0.441744	5.00664	9.95163e-07	4.46529e-06	4.97557
APCDD1L	2.37323	0.288519	5.00466	1.00457e-06	4.50464e-06	4.96656
LBP	2.19107	0.195917	4.97345	1.16481e-06	5.15566e-06	4.82477
HOXA9	3.06889	0.106367	4.88759	1.7438e-06	7.46296e-06	4.4385
PRRX2	2.34366	0.294745	4.87715	1.8308e-06	7.79052e-06	4.39192
C19orf59	3.48626	0.273135	4.8579	2.00232e-06	8.45467e-06	4.30627
IL1RN	2.30761	0.131955	4.83007	2.2781e-06	9.52628e-06	4.18289
GATA3	2.00576	0.0104534	4.67933	4.53666e-06	1.78787e-05	3.52513
HOXB13	3.16366	0.19736	4.66236	4.8972e-06	1.92102e-05	3.4522
HMGA2	2.23114	0.265286	4.65084	5.15746e-06	2.01125e-05	3.40283
C6orf15	4.78029	0.346566	4.62033	5.9132e-06	2.27876e-05	3.2725
CCL18	2.576	0.702351	4.5221	9.13887e-06	3.39942e-05	2.85801
EREG	3.95713	0.142809	4.48771	1.06251e-05	3.9039e-05	2.71471
COL6A3	2.84403	0.0453756	4.4828	1.08554e-05	3.97988e-05	2.69432
C1orf189	2.24205	0.375662	4.48011	1.09837e-05	4.02453e-05	2.68315
AGR3	4.17343	0.178945	4.46713	1.1623e-05	4.23961e-05	2.62937
MMP1	3.4798	0.104929	4.38826	1.63452e-05	5.80071e-05	2.30558
HCAR2	2.84379	0.252872	4.32912	2.10411e-05	7.3221e-05	2.06605
OSR2	2.55518	0.0377453	4.3143	2.24054e-05	7.75919e-05	2.0065
CCDC37	2.79308	0.395124	4.30214	2.35885e-05	8.12206e-05	1.95774
CCL20	3.90993	0.204443	4.26228	2.79005e-05	9.45126e-05	1.79874
C1orf158	2.03785	0.636982	4.24456	3.00493e-05	0.000101073	1.72852
FPR2	3.28303	0.0304647	4.23461	3.13255e-05	0.00010495	1.68916
CXCL1	2.38252	0.195365	4.23369	3.14463e-05	0.000105317	1.68552
FCGR3A	2.01038	0.00968257	4.2205	3.32225e-05	0.000110748	1.63354
VGLL2	2.22641	0.028606	4.21798	3.35727e-05	0.000111755	1.62362
KRT16	2.3499	0.0613826	4.2037	3.56253e-05	0.000118039	1.5675
NOS2	2.14968	0.955132	4.15627	4.33391e-05	0.00014126	1.38227
DKK1	2.57368	1.0194	4.09429	5.58389e-05	0.00017838	1.14306
EPHX3	2.17222	0.00714017	4.05429	6.56557e-05	0.000207006	0.990363
CCDC42B	2.44123	0.459662	4.02061	7.51746e-05	0.000234281	0.86282
ROPN1L	2.51329	0.116443	4.00132	8.1204e-05	0.000251555	0.790186
DPPA4	2.64602	0.124614	3.93691	0.000104833	0.000317776	0.549974
NUP62CL	2.13127	0.0596588	3.92308	0.0001107	0.000334475	0.498809
LRRC71	2.26224	0.187439	3.92063	0.000111767	0.000337531	0.489797
LCN2	2.5393	0.194386	3.91557	0.000114012	0.000343975	0.47112
CCL13	2.07941	0.241224	3.85402	0.000144933	0.000427429	0.245909
FAM92B	2.25136	0.180776	3.84892	0.000147824	0.000435405	0.227386
MMP8	3.25014	0.113846	3.82513	0.000162043	0.000473542	0.1413
HCAR3	2.67504	0.228747	3.81896	0.000165937	0.000483707	0.11905
S100P	2.03402	0.412034	3.80023	0.000178312	0.000516383	0.0516848
SP8	2.30562	0.0254393	3.78124	0.000191736	0.000552082	-0.0162672
LGR6	3.11206	0.0443983	3.70612	0.000254816	0.000718494	-0.282178
CDHR4	2.94769	0.112596	3.70553	0.000255379	0.000719863	-0.284239
PLA2G2A	3.52819	0.0399205	3.6701	0.000291572	0.000811685	-0.407948
TWIST2	2.39782	0.0257881	3.62214	0.000348321	0.000955101	-0.573734
SAA2-SAA4	5.13158	0.0393942	3.62122	0.000349505	0.000958064	-0.576893
KRT18	2.21078	0.0415284	3.60694	0.000368367	0.00100489	-0.625844
C15orf26	2.03906	0.316839	3.59297	0.000387744	0.00105373	-0.673567
FDCSP	3.24724	0.0786188	3.50384	0.000535774	0.00141734	-0.974084
FCN3	2.03678	0.041239	3.49563	0.000551797	0.00145518	-1.00143
MMP13	5.15691	0.241785	3.48134	0.000580757	0.00152486	-1.04887
C11orf88	3.57059	0.117067	3.43873	0.000675778	0.00174797	-1.18927
ORM1	3.4996	0.0732108	3.30763	0.0010672	0.00265673	-1.61132
MAK	2.45579	0.0102468	3.14711	0.00183165	0.00436432	-2.1074
DLX5	2.02079	0.997167	3.14117	0.00186788	0.00444268	-2.12532
MMP12	2.36001	0.331359	3.12729	0.0019551	0.00463829	-2.16707
COMP	3.0049	0.14315	3.12285	0.00198381	0.00470221	-2.1804
CXCL5	2.74995	1.13917	3.09262	0.00218967	0.00514497	-2.2706
ELF3	2.3728	0.00857022	3.03549	0.00263345	0.00607878	-2.43885
BPIFB4	2.35873	0.112224	3.02764	0.00270045	0.00622031	-2.46172
TMEM190	3.2783	0.118395	2.99513	0.00299523	0.00683675	-2.55594
CLDN14	2.16502	0.00326747	2.88278	0.0042556	0.00943488	-2.87416
EGFL6	2.63571	0.0447393	2.8282	0.00502807	0.011006	-3.02461
FAM216B	2.83588	0.141278	2.76058	0.00616101	0.0132614	-3.20725
SCGB3A2	2.05154	0.223329	2.75321	0.00629751	0.0135255	-3.2269
MAP3K19	2.21367	0.00517393	2.73397	0.00666684	0.0142415	-3.27797
ATP4B	2.34034	0.0725235	2.72314	0.00688341	0.0146554	-3.30659
C4A	2.00145	0.00334782	2.70707	0.00721633	0.0152952	-3.34884
TMPRSS7	2.18417	0.00575866	2.65369	0.00842887	0.0176333	-3.48745
STOML3	3.73335	0.0154679	2.6158	0.00939761	0.0194372	-3.58424
PTPN22	2.05903	0.00255515	2.60068	0.00981111	0.0202239	-3.62249
BMP5	2.88244	0.238542	2.58315	0.0103112	0.021167	-3.66659
MYL4	2.19347	0.0117522	2.55545	0.0111477	0.0227213	-3.73568
CAPN6	5.01237	0.148429	2.53816	0.0117001	0.023751	-3.77844
PIH1D3	5.60696	0.0088734	2.51506	0.0124764	0.0251896	-3.83516
CAPSL	2.62905	0.0496961	2.50425	0.0128552	0.0258673	-3.86153
ANKRD66	2.71318	0.143947	2.49873	0.0130523	0.0262017	-3.87494
PITX2	2.68958	0.0234725	2.44994	0.0149164	0.0295676	-3.99233
SAA4	3.37909	0.0277936	2.44382	0.0151663	0.030031	-4.00691
MLN	2.26776	0.00531277	2.43508	0.0155296	0.0306754	-4.02766
FCGR2B	3.7799	0.00138329	2.4286	0.0158037	0.0311409	-4.043
TNMD	2.82995	0.21181	2.42519	0.0159496	0.0314117	-4.05105
DLK1	5.18037	0.459825	2.41698	0.016306	0.0320153	-4.0704
MYOG	2.84139	0.191916	2.36662	0.0186498	0.036141	-4.1877
CXCL13	2.4619	0.521368	2.34931	0.0195215	0.0376654	-4.22748
UTF1	2.00478	0.0556233	2.33746	0.0201383	0.0387272	-4.25454
KCNJ15	2.60506	0.00368607	2.33426	0.0203079	0.0390251	-4.26183
POU2F3	2.66817	0.00187806	2.32576	0.0207646	0.0398164	-4.28115
NTS	4.25855	0.366256	2.28496	0.0230827	0.0437302	-4.37288
C8orf69	3.15645	0.00279209	2.2687	0.0240676	0.0454388	-4.409
MYLPF	2.72239	0.149388	2.24843	0.0253472	0.0476085	-4.4537
C6	3.79259	0.00591753	2.23876	0.0259781	0.0486609	-4.47489
REG1A	3.25028	0.156574	2.23288	0.0263681	0.0492823	-4.48772
