# Supplementary material for: Long non-coding RNA, HOTAIRM1, promotes glioma malignancy by forming a ceRNA network
Source: Aging (Albany NY). 2019 Sep 2;11(17):6805–38. doi: 10.18632/aging.102205 (PMC6756894; doi:10.18632/aging.102205)
Supplement: Supplementary Dataset 2 [file aging-11-102205-s001.xlsx]

## Sheet: 工作表2
Supplementary Dataset 2
Differentially downregulated miRNAs (down-DE miRNAs) in glioblastoma (GBM) compared with normal brain tissue.
miRNA_ID	miRBase_ID	logFC	AveExpr	t	P.Value	adj.P.Val	B
hsa-miR-129-5p	MIMAT0000242	-3.30863	6.72851	-18.3521	1.54e-59	7.25e-57	124.736
hsa-miR-769-5p	MIMAT0003886	-1.29845	6.52009	-16.1758	9.06e-49	2.13e-46	100.086
hsa-miR-139-5p	MIMAT0000250	-4.02356	7.03289	-16.1054	1.99e-48	3.11e-46	99.306
hsa-miR-491-5p	MIMAT0002807	-2.01614	6.71997	-15.5377	1.06e-45	1.24e-43	93.067
hsa-miR-433-3p	MIMAT0001627	-1.06018	5.98069	-15.5111	1.42e-45	1.33e-43	92.7766
hsa-miR-218-5p	MIMAT0000275	-3.28588	6.73425	-14.9336	7.64e-43	5.98e-41	86.528
hsa-miR-137-3p	MIMAT0000429	-3.73931	6.72595	-14.6035	2.66e-41	1.78e-39	83.0025
hsa-miR-628-3p	MIMAT0003297	-0.960176	6.3411	-14.278	8.49e-40	4.99e-38	79.5625
hsa-miR-485-5p	MIMAT0002175	-0.659773	5.99664	-13.6346	7.16e-37	3.74e-35	72.8723
hsa-miR-128-3p	MIMAT0000424	-2.66009	7.25869	-12.9461	8.14e-34	3.48e-32	65.8888
hsa-miR-128b	MIMAT0000676	-3.08861	7.66847	-12.5545	4.08e-32	1.6e-30	62.0053
hsa-miR-132-3p	MIMAT0000426	-2.06651	7.9191	-12.3724	2.46e-31	8.9e-30	60.2227
hsa-miR-330-3p	MIMAT0000751	-1.61451	6.70376	-12.0262	7.21e-30	2.26e-28	56.8749
hsa-miR-323a-3p	MIMAT0000755	-1.41133	6.24895	-11.8948	2.56e-29	7.51e-28	55.6188
hsa-miR-329-3p	MIMAT0001629	-1.04712	6.1003	-11.4712	1.44e-27	3.97e-26	51.6277
hsa-miR-138-5p	MIMAT0000430	-2.46251	6.67192	-11.1009	4.5e-26	1.18e-24	48.2136
hsa-miR-326	MIMAT0000756	-0.552321	5.9696	-10.6983	1.76e-24	4.14e-23	44.5845
hsa-miR-124-3p	MIMAT0000422	-5.93098	9.53915	-10.665	2.37e-24	5.31e-23	44.2879
hsa-miR-490-3p	MIMAT0002806	-0.584652	5.96927	-10.6419	2.92e-24	6.24e-23	44.083
hsa-miR-7-5p	MIMAT0000252	-3.68447	7.66253	-10.3545	3.75e-23	7.67e-22	41.556
hsa-miR-410-3p	MIMAT0002171	-2.18314	7.24339	-10.2527	9.18e-23	1.8e-21	40.6718
hsa-miR-383-5p	MIMAT0000738	-1.0484	6.07404	-9.88037	2.29e-21	4.3e-20	37.4916
hsa-miR-381-3p	MIMAT0000736	-1.11865	6.43414	-9.70472	1.01e-20	1.83e-19	36.02
hsa-miR-582-5p	MIMAT0003247	-0.725964	6.02984	-9.61076	2.23e-20	3.88e-19	35.2406
hsa-miR-432-5p	MIMAT0002814	-1.31	6.99631	-9.26393	3.91e-19	6.13e-18	32.4115
hsa-miR-203a-3p	MIMAT0000264	-0.378475	5.89382	-9.01718	2.87e-18	4.35e-17	30.4457
hsa-miR-539-5p	MIMAT0003163	-0.282007	5.84001	-8.63592	5.76e-17	8.46e-16	27.4872
hsa-miR-379-5p	MIMAT0000733	-1.88471	7.26583	-8.54995	1.12e-16	1.59e-15	26.8335
hsa-miR-411-5p	MIMAT0003329	-1.03309	6.30248	-8.43467	2.7e-16	3.73e-15	25.9651
hsa-miR-95-3p	MIMAT0000094	-1.06373	6.53541	-8.4147	3.14e-16	4.22e-15	25.8156
hsa-miR-342-3p	MIMAT0000753	-1.27749	9.26359	-8.29269	7.9e-16	1.03e-14	24.9081
hsa-miR-504-5p	MIMAT0002875	-0.765734	6.02585	-7.77624	3.48e-14	4.09e-13	21.1838
hsa-miR-338-3p	MIMAT0000763	-3.43406	9.5396	-7.73706	4.6e-14	5.27e-13	20.9091
hsa-miR-29c-3p	MIMAT0000681	-1.68283	10.0675	-7.71983	5.2e-14	5.82e-13	20.7887
hsa-miR-758-3p	MIMAT0003879	-0.873505	6.4324	-7.65446	8.26e-14	9.03e-13	20.3337
hsa-miR-598-3p	MIMAT0003266	-0.685509	6.44322	-7.55735	1.63e-13	1.71e-12	19.6636
hsa-miR-154-3p	MIMAT0000453	-1.06797	6.29673	-7.53415	1.92e-13	1.96e-12	19.5046
hsa-miR-107	MIMAT0000104	-0.97682	10.9374	-7.50994	2.28e-13	2.28e-12	19.3391
hsa-miR-154-5p	MIMAT0000452	-0.706286	6.313	-7.36754	6.08e-13	5.83e-12	18.3743
hsa-miR-299-5p	MIMAT0002890	-1.05529	6.60601	-7.3678	6.07e-13	5.83e-12	18.376
hsa-miR-656-3p	MIMAT0003332	-0.264017	5.83559	-7.16859	2.34e-12	2.2e-11	17.0519
hsa-miR-153-3p	MIMAT0000439	-0.413225	5.87194	-6.93229	1.12e-11	1.03e-10	15.5208
hsa-miR-409-5p	MIMAT0001638	-0.389949	6.07327	-6.84065	2.03e-11	1.83e-10	14.9386
hsa-miR-149-5p	MIMAT0000450	-1.7415	9.011	-6.75017	3.62e-11	3.21e-10	14.3703
hsa-miR-136-5p	MIMAT0000448	-1.78194	7.7215	-6.46738	2.14e-10	1.79e-09	12.6359
hsa-miR-496	MIMAT0002818	-0.0981262	5.751	-6.41607	2.93e-10	2.41e-09	12.328
hsa-miR-324-5p	MIMAT0000761	-1.02801	8.05544	-6.40888	3.06e-10	2.48e-09	12.2851
hsa-miR-127-3p	MIMAT0000446	-1.77267	8.11776	-6.39304	3.37e-10	2.68e-09	12.1906
hsa-miR-340-3p	MIMAT0000750	-0.734248	6.60257	-6.35725	4.19e-10	3.28e-09	11.9777
hsa-miR-219a-5p	MIMAT0000276	-3.41632	9.89084	-6.32268	5.17e-10	3.92e-09	11.7732
hsa-miR-485-3p	MIMAT0002176	-0.961264	6.39158	-6.28625	6.44e-10	4.73e-09	11.5587
hsa-miR-376a-5p	MIMAT0003386	-0.179042	5.8279	-6.27484	6.9e-10	4.99e-09	11.4917
hsa-miR-448	MIMAT0001532	-0.108417	5.73011	-6.15539	1.41e-09	9.87e-09	10.797
hsa-miR-29b-3p	MIMAT0000100	-1.54193	11.0601	-6.05935	2.47e-09	1.71e-08	10.247
hsa-miR-103a-3p	MIMAT0000101	-0.894578	10.6766	-6.00729	3.35e-09	2.28e-08	9.95196
hsa-miR-133b	MIMAT0000770	-0.631062	6.25766	-5.99173	3.67e-09	2.46e-08	9.86426
hsa-miR-331-3p	MIMAT0000760	-0.912415	9.94108	-5.88672	6.7e-09	4.32e-08	9.27745
hsa-miR-133a-3p	MIMAT0000427	-0.480671	6.1237	-5.44272	7.78e-08	4.81e-07	6.89862
hsa-miR-377-3p	MIMAT0000730	-1.49612	7.73697	-5.34391	1.31e-07	7.75e-07	6.39205
hsa-miR-495-3p	MIMAT0002817	-0.536311	6.25984	-5.21956	2.51e-07	1.46e-06	5.76647
hsa-miR-1-3p	MIMAT0000416	-0.371184	5.92172	-5.13818	3.81e-07	2.16e-06	5.36433
hsa-miR-380-3p	MIMAT0000735	-0.196351	5.8318	-5.083	5.03e-07	2.82e-06	5.09493
hsa-miR-517c-3p	MIMAT0002866	-0.278825	5.82057	-5.07996	5.11e-07	2.83e-06	5.0802
hsa-miR-33a-5p	MIMAT0000091	-1.03196	7.61614	-4.80473	1.98e-06	1.03e-05	3.77705
hsa-miR-487b-3p	MIMAT0003180	-0.943245	8.75223	-4.63203	4.48e-06	2.19e-05	2.99359
hsa-miR-487a-3p	MIMAT0002178	-0.646948	6.89533	-4.53409	7.05e-06	3.25e-05	2.56109
hsa-miR-29a-3p	MIMAT0000086	-0.879285	12.4614	-4.40069	1.29e-05	5.55e-05	1.98585
hsa-miR-369-5p	MIMAT0001621	-0.231776	6.00584	-4.189	3.24e-05	0.000136083	1.10605
hsa-miR-512-3p	MIMAT0002823	-0.277113	6.25146	-4.15017	3.83e-05	0.00015913	0.949083
hsa-miR-488-5p	MIMAT0002804	-0.262985	6.09936	-3.99363	7.35e-05	0.000287199	0.330287
hsa-miR-134-5p	MIMAT0000447	-0.586101	7.00162	-3.95092	8.75e-05	0.000331823	0.165381
hsa-miR-592	MIMAT0003260	-0.355984	6.04314	-3.89756	0.000108632	0.000405214	-0.0383147
hsa-miR-145-5p	MIMAT0000437	-0.88969	10.4992	-3.88983	0.000112058	0.000414703	-0.0676003
hsa-miR-577	MIMAT0003242	-0.101323	5.78844	-3.72852	0.0002117	0.000748112	-0.666194
hsa-miR-211-5p	MIMAT0000268	-0.241027	5.92693	-3.58298	0.000368547	0.00124617	-1.18554
hsa-miR-409-3p	MIMAT0001639	-0.607512	7.33393	-3.56668	0.0003917	0.00131499	-1.24247
hsa-miR-328-3p	MIMAT0000752	-0.560342	6.42739	-3.53117	0.000446934	0.00148978	-1.36563
hsa-miR-625-5p	MIMAT0003294	-0.328329	6.66745	-3.43244	0.000641258	0.00207856	-1.70191
hsa-miR-222-3p	MIMAT0000279	-1.268	9.66353	-3.34319	0.000882147	0.00274576	-1.99798
hsa-miR-221-3p	MIMAT0000278	-0.86784	7.80356	-3.16707	0.00162157	0.00491702	-2.56022
hsa-miR-125a-5p	MIMAT0000443	-0.539601	10.6996	-3.07289	0.00222049	0.00652269	-2.84883
hsa-miR-585-3p	MIMAT0003250	-0.0542969	5.81201	-2.98745	0.00293328	0.00851014	-3.10336
hsa-miR-346	MIMAT0000773	-0.18257	5.9611	-2.85921	0.00440131	0.0123869	-3.47233
hsa-miR-185-5p	MIMAT0000455	-0.409866	8.69867	-2.83515	0.00474184	0.0130331	-3.53981
hsa-miR-382-5p	MIMAT0000737	-0.279168	6.59968	-2.78574	0.00551702	0.0149884	-3.67663
hsa-miR-425-3p	MIMAT0001343	-0.130736	5.98074	-2.73373	0.00645536	0.0173372	-3.81812
hsa-miR-101-3p	MIMAT0000099	-0.550011	10.2733	-2.68148	0.00754049	0.0200228	-3.95763
hsa-miR-521	MIMAT0002854	-0.120953	5.83004	-2.67722	0.00763579	0.0201619	-3.96889
