# Supplementary material for: Long non-coding RNA, HOTAIRM1, promotes glioma malignancy by forming a ceRNA network
Source: Aging (Albany NY). 2019 Sep 2;11(17):6805–38. doi: 10.18632/aging.102205 (PMC6756894; doi:10.18632/aging.102205)
Supplement: Supplementary Dataset 3 [file aging-11-102205-s002.xlsx]

## Sheet: 工作表1
Supplementary Dataset 3
Gene set on activation of immune response, T cell-mediated immune response and immune response to tumor cell
Terms	Displayed name (Figure 8 and Supplementary Figure 8)	Source
GO_ACTIVATION_OF_IMMUNE_RESPONSE	Activation of immune response	msigdb.v6.2	PSMA4	COLEC12	TBK1	IGHE	PYDC1	PSMC5	PPAPDC1A	WIPF3	PSMA7	C8B	CTSB	CD209	CYLD	PSMA5	VAV1	PRKCB	CD79B	ICAM2	NFAM1	IRF3	SLA2	LY96	PSMC6	SKAP2	PIK3CB	PSMB11	HRAS	C1QBP	UBE2N	TRAT1	PYCARD	TRDC	TLR4	HLA-DRB1	SPG21	PSMD6	TAB2	MYD88	SIN3A	TICAM1	PSMA8	PSMB1	RELB	UBB	NFATC2	C1orf38	PTEN
GO_POSITIVE_REGULATION_OF_T_CELL_MEDIATED_CYTOTOXICITY	T cell-mediated immune response	msigdb.v6.2	FADD	IL12A	P2RX7	XCL1	IL12RB1	PVRL2	IL23R	PVR	HLA-A	HLA-E	B2M	HLA-B	NCR3	IL12B	IL23A	STX7
GO_T_CELL_ACTIVATION_INVOLVED_IN_IMMUNE_RESPONSE		msigdb.v6.2	RAB27A	CLEC4E	IFNE	SLC11A1	GATA3	IFNA8	IL12B	LCP1	RPS6	CLEC4D	IFNA13	IFNB1	SLAMF6	HMGB1	LILRB1	IL6	IFNA6	IFNA17	IFNA21	IFNA4	IFNA5	ATP7A	IFNW1	SEMA4A	APBB1IP	LY9	IFNA16	PSEN1	IFNA7	TNFSF18	IL4	IL18R1	FOXP1	PTGER4	IFNA2	IFNK	RC3H2	IFNA14	TSC1	BATF	EIF2AK4	RORC	ICAM1	CD86	STAT6	IFNG	F2RL1
GO_POSITIVE_REGULATION_OF_T_CELL_MEDIATED_IMMUNITY		msigdb.v6.2	FZD5	HSPD1	IL1B	HLA-A	TNFSF4	PVRL2	IL23R	ZBTB1	ZP3	P2RX7	FADD	GATA3	MALT1	IL12B	MAP3K7	RSAD2	HLA-B	HLA-E	B2M	TRAF6	PVR	IL12RB1	IL12A	XCL1	PRKCZ	SASH3	TRAF2	STX7	IL23A	NLRP3	FOXP3	NCR3
IMMUNE_RESPONSE_TO_TUMOR_CELL	Immune response to tumor cell	GO:0002418	HRG	PRF1	CD226	HAVCR2	PVRL2	NCR3	HMGB1	MICA	PVR	CEACAM1	HSPD1	IL12B	IL12A	CRTAM
[truncated: 380 more columns]
